# Supplementary material for: Sustainable synthesis of a catalytic active one-dimensional lanthanide–organic coordination polymer
Source: Royal Society of Chemistry journal article supplement (doi:10.1039/c5cc01888a), 2015-01-01
Supplement: c5cc01888a1.pdf [file c5cc01888a1.pdf]

# Sustainable Synthesis of a Catalytic Active One-Dimensional Lanthanide-Organic Coordination Polymer

**Ricardo F. Mendes, Patrícia Silva, Margarida M. Antunes,  
Anabela A. Valente, Filipe A. Almeida Paz\***

*A contribution from*

*Department of Chemistry, CICECO, University of Aveiro, 3810-193 Aveiro, Portugal*

## Electronic Supporting Information

---

*To whom correspondence should be addressed:*

Filipe A. Almeida Paz  
Department of Chemistry, CICECO  
University of Aveiro  
3810-193 Aveiro  
Portugal

E-mail: [filipe.paz@ua.pt](mailto:filipe.paz@ua.pt)  
FAX: (+351) 234 401470  
Telephone: (+351) 234 370200 (Ext. 23553)

# Table of Contents

## 1. Experimental Section

|                                                                                                                                                                              |     |
|------------------------------------------------------------------------------------------------------------------------------------------------------------------------------|-----|
| 1.1. General Instrumentation .....                                                                                                                                           | S3  |
| 1.2. Reagents and Solvents .....                                                                                                                                             | S4  |
| 1.3. Synthesis of [La <sub>2</sub> (H <sub>3</sub> nmp) <sub>2</sub> (H <sub>2</sub> O) <sub>4</sub> ]·4.5H <sub>2</sub> O ( <b>1</b> )                                      |     |
| 1.3.1. Microwave-Assisted Synthesis: <b>1mw</b> .....                                                                                                                        | S4  |
| 1.3.2. Hydrothermal Synthesis: <b>1h</b> .....                                                                                                                               | S4  |
| 1.3.3. One-pot Synthesis: <b>1op</b> .....                                                                                                                                   | S5  |
| 1.4. Stability Tests of [La <sub>2</sub> (H <sub>3</sub> nmp) <sub>2</sub> (H <sub>2</sub> O) <sub>4</sub> ]·4.5H <sub>2</sub> O ( <b>1mw</b> ) .....                        | S5  |
| 1.6. Transformation Tests                                                                                                                                                    |     |
| 1.6.1. Hydrothermal conditions .....                                                                                                                                         | S6  |
| 1.6.2. One-pot .....                                                                                                                                                         | S6  |
| 1.7. Single-Crystal X-ray Diffraction Studies: [La <sub>2</sub> (H <sub>3</sub> nmp) <sub>2</sub> (H <sub>2</sub> O) <sub>4</sub> ]·4.5H <sub>2</sub> O ( <b>1op</b> ) ..... | S6  |
| 1.8. Synchrotron Powder X-ray Diffraction Studies .....                                                                                                                      | S13 |
| 1.9. Heterogeneous Catalysis.....                                                                                                                                            | S17 |

## 2. Structural Studies

|                                                                     |     |
|---------------------------------------------------------------------|-----|
| 2.1. <b>1mw</b>                                                     |     |
| 2.1.1. Electron Microscopy Studies: EDS Mapping .....               | S18 |
| 2.1.2. <sup>31</sup> P Solid-State Nuclear Magnetic Resonance ..... | S19 |
| 2.1.3. Thermogravimetry and Thermodiffraction .....                 | S20 |
| 2.2. Bulk <b>1mw</b> vs. <b>1h</b> vs. <b>1op</b>                   |     |
| 2.2.1. Powder X-ray Diffraction and SEM studies .....               | S22 |
| 2.2.2. FT-IR Spectroscopy Studies .....                             | S22 |
| 2.2.3. Thermogravimetry .....                                       | S22 |
| 2.2.4. Crystal structure overlay .....                              | S22 |

## 3. Heterogeneous Catalysis

|                                          |     |
|------------------------------------------|-----|
| 3.1. Epoxide Ring Opening .....          | S26 |
| 3.2. Acetalization of Benzaldehyde ..... | S28 |

## 4. Transformation Studies .....

S37

## 5. References.....

S42

# 1. Experimental Section

## 1.1. General Instrumentation

SEM (Scanning Electron Microscopy) images were acquired using either a Hitachi S4100 field emission gun tungsten filament instrument working at 25 kV, or a high-resolution Hitachi SU-70 working at 4 kV. Samples were prepared by deposition on aluminium sample holders followed by carbon coating using an Emitech K950X carbon evaporator. EDS (Energy Dispersive X-ray Spectroscopy) data and SEM mapping images were recorded using the latter microscope working at 15 kV and using either a Bruker Quantax 400 or a Sprit 1.9 EDS microanalysis system.

Thermogravimetric analyses (TGA) were carried out using a Shimadzu TGA 50, from ambient temperature to *ca.* 800 °C (heating rate of 5 °C/min), and from ambient temperature to *ca.* 160 °C (heating rate of 1 °C/min) under a continuous stream of air or N<sub>2</sub> at a flow rate of 20 mL min<sup>-1</sup>.

Fourier Transform Infrared (FT-IR) spectra (in the range 4000-350 cm<sup>-1</sup>) were recorded as KBr pellets (2 mg of sample were mixed in a mortar with 200 mg of KBr) using a Bruker Tensor 27 spectrometer by averaging 256 scans at a maximum resolution of 2 cm<sup>-1</sup>.

Elemental analyses for C, N and H were performed with a Truspec 630-200-200 elemental analyzer at the Department of Chemistry, University of Aveiro. Samples (with mass typically between 1 and 2 mg) were combusted at 850 °C for 4 minutes under an oxygen atmosphere. Helium was used as the carrier gas.

Routine Powder X-Ray Diffraction (PXRD) data for all prepared materials were collected at ambient temperature on a Empyrean PANalytical diffractometer (Cu K<sub>a1,2</sub> X-radiation,  $\lambda_1 = 1.540598 \text{ \AA}$ ;  $\lambda_2 = 1.544426 \text{ \AA}$ ), equipped with an PIXcel 1D detector and a flat-plate sample holder in a Bragg-Brentano para-focusing optics configuration (45 kV, 40 mA). Intensity data were collected by the step-counting method (step 0.01°), in continuous mode, in the *ca.*  $3.5 \leq 2\theta \leq 50^\circ$  range.

Variable-temperature powder X-ray diffraction data were collected on an PANalytical X'Pert Powder diffractometer Cu K<sub>a1,2</sub> X-radiation ( $\lambda_1 = 1.540598 \text{ \AA}$ ;  $\lambda_2 = 1.544426 \text{ \AA}$ ), equipped with an PIXcel 1D detector, and a flat-plate sample holder in a Bragg-Brentano para-focusing optics configuration (40 kV, 50 mA), and a high-temperature Anton Paar HKL 16 chamber controlled by an Anton Paar 100 TCU unit. Intensity data were collected in the continuous mode (*ca.* 100 seconds data acquisition) in the angular range *ca.*  $3.5 \leq 2\theta \leq 50$ .

<sup>31</sup>P MAS spectra were recorded at 9.4 T on a Bruker Avance 400 wide-bore spectrometer (DSX model) on a 4 mm BL cross-polarization magic-angle spinning (CPMAS) VTN probe at 161.9 MHz. <sup>31</sup>P HPDEC spectra a 90° single pulse excitation of 3.0 μs was employed; recycle delay: 60 s;  $\nu_R = 8$  or 12 kHz. Chemical shifts are quoted in parts per million (ppm) with respect to an 85% H<sub>3</sub>PO<sub>4</sub> solution.

## 1.2. Reagents and Solvents

Chemicals, including solvents, were readily available from commercial sources and were used as received without further purification: lanthanum (III) oxide (99.9%, Sigma-Aldrich); nitrilotri(methylphosphonic) acid ( $\geq 97.0\%$ , Sigma-Aldrich); sulphuric acid (98%, José Manuel Gomes dos Santos Lda); potassium bromide (KBr for infra-red spectroscopy, BDH Spectrosol); styrene oxide ( $C_8H_8O$ , *purum*  $\geq 97\%$ , Fluka); methanol (Chromasolv for HPLC,  $\geq 99.9\%$ , Sigma-Aldrich); ethanol absolute (analytical grade 99.9%, Scharlau, ACS); benzaldehyde (99%, Sigma-Aldrich).

## 1.3. Synthesis of $[La_2(H_3nmp)_2(H_2O)_4] \cdot 4.5H_2O$ (**1**)

### 1.3.1 Microwave-Assisted Synthesis: **1mw**

A reactive mixture composed of 0.1422 g (0.477 mmol) of nitrilotri(methylphosphonic) acid ( $H_6nmp$ ) and 0.0808 g (0.247 mmol) of  $La_2O_3$  in *ca.* 5 mL of distilled water and 100  $\mu$ L of concentrated sulphuric acid, with an overall molar ratio of *ca.* 0.5 : 1 : 600 : 4 ( $La^{3+} : H_6nmp : H_2O : H_2SO_4$ ), was prepared at ambient temperature inside a 10 mL IntelliVent microwave reactor. Reaction took place inside a CEM Focused Microwave Synthesis System Discover S-Class equipment, under constant magnetic stirring (controlled by the microwave equipment) using, typically, an irradiation power of 50 W. A constant flow of air (*ca.* 20-30 psi of pressure) ensured a close control of the temperature inside the reactor. The resulting product,  $[La_2(H_3nmp)_2(H_2O)_4] \cdot 4.5H_2O$  (**1mw**), was isolated as a white microcrystalline powder and it was recovered by vacuum filtration, washed with copious amounts of distilled water and then air-dried at ambient temperature.

The optimal synthetic conditions were found by systematically varying the microwave-assisted experimental parameters such as: temperature (60, 100, and 140 °C) and irradiation time (1, 5, 15 and 30 min). The irradiation power was maintained constant at 50 W.

Elemental CHN composition (%). Calcd: C 6.65; H 3.31, N 2.67. Found: C 6.85; H 3.83, N 2.66.

Thermogravimetric analysis (TGA) data (weight losses in %) and derivative thermogravimetric peaks (DTG; in italics inside the parentheses): 22-99 °C -5.53% (82 °C); 99-189 °C -9.41% (138 °C); 189-472 °C -6.32% (401 °C); 472-554 °C -1.34% (509 °C); 554-778 °C -4.75% (704 °C). Total loss: 27.4%.

Selected FT-IR data (in  $cm^{-1}$ ; from KBr pellets):  $\nu(H_2O) = 3500-3000br$ ;  $\nu(-CH_2-) = 3064-2855w-m$ ;  $\nu(POH) = 2828-2512w-m$ ;  $\delta(H_2O) = 1651m$ ;  $\delta(P-CH_2) = 1450m, 1431m$  and  $1417m$ ;  $\nu(P=O) = 1300-1100m-vs$ ;  $\nu(P-O) = 1100-873vs$ ;  $\nu(P-C) = 791m$  and  $754m$ .

### 1.3.2 Hydrothermal Synthesis: **1h**

The hydrothermal approach towards **1h** is similar to that describe above for **1mw** with very small modifications: a reactive mixture containing  $H_6nmp$  (0.26 g, 0.869 mmol) and  $La_2O_3$  (0.14 g, 0.430



mmol) in *ca.* 10.0 mL of distilled water, molar ratio 1 : 2 : 1300 ( $\text{La}^{3+}$  :  $\text{H}_6\text{nmp}$  :  $\text{H}_2\text{O}$ ), but without the addition of acid, was placed inside an adapted Teflon-lined Parr Instruments reaction vessel (autoclave with internal volume of *ca.* 10 mL). The vessel was then placed inside a pre-heated oven at 100 °C for a period of 72 hours. After this period, the vessel was quenched to ambient temperature by immersing under cool water. The resulting white powder, identified as **1h**, was recovered by vacuum filtration, washed with copious amounts of distilled water and then air-dried at ambient temperature.

Elemental CHN composition (%). Calcd: C 6.65; H 3.31, N 2.67. Found: C 6.73; H 3.68, N 2.54.

Thermogravimetric analysis (TGA) data (weight losses in %) and derivative thermogravimetric peaks (DTG; in italics inside the parentheses): 22-31 °C -0.62% (28 °C); 31-80 °C -4.82% (73 °C); 80-105 -3.36% (91 °C); 105-160 °C -7.11% (125 °C); 160-434 °C -3.35% (301 °C); 434-512 °C -1.88% (466 °C); 512-787 -6.23 °C (543 °C). Total loss: 27.4%.

Selected FT-IR data (in  $\text{cm}^{-1}$ ; from KBr pellets):  $\nu(\text{H}_2\text{O}) = 3500\text{-}3125$ ;  $\nu(-\text{CH}_2-)$  = 3055-2915 $w$ - $m$ ;  $\nu(\text{POH}) = 2844\text{-}2530w\text{-}m$ ;  $\delta(\text{H}_2\text{O}) = 1664m$ ;  $\delta(\text{P}-\text{CH}_2) = 1450m$ , 1431 $m$  and 1417 $m$ ;  $\nu(\text{P}=\text{O}) = 1255\text{-}1109m\text{-}vs$ ;  $\nu(\text{P}-\text{O}) = 1109\text{-}888vs$ ;  $\nu(\text{P}-\text{C}) = 755m$  and 727 $m$ .

### 1.3.3 One-pot synthesis: 1op

This approach was developed and optimized with two main objectives: i) to isolate crystals suitable for single-crystal X-ray diffraction studies; ii) to develop an alternative sustainable synthetic approach to that described above where microwave irradiation was used. A reactive mixture composed of 0.0845 g (0.283 mmol) of nitrilotri(methylphosphonic) acid ( $\text{H}_6\text{nmp}$ ) and 0.1588 g (0.487 mmol) of  $\text{La}_2\text{O}_3$  in *ca.* 10 mL of distilled water, with an overall molar ratio of *ca.* 0.5 : 1 : 2000 ( $\text{La}^{3+}$  :  $\text{H}_6\text{nmp}$  :  $\text{H}_2\text{O}$ ), was prepared at ambient temperature inside a 25 mL round glass flask and kept under vigorous magnetic stirring for 4 hours at 120 °C. The resulting white powder was recovered by vacuum filtration, washed with copious amounts of distilled water and then air-dried at ambient temperature.

Elemental CHN composition (%). Calcd: C 6.65; H 3.31, N 2.67. Found: C 6.62; H 3.47, N 2.70.

Thermogravimetric analysis (TGA) data (weight losses in %) and derivative thermogravimetric peaks (DTG; in italics inside the parentheses): 22-45 °C -1.62% (34 °C); 45-96 °C -4.65% (75 °C); 96-180 -9.17% (128 °C); 180-458 °C -5.53% (402 °C); 458-771 °C -4.46% (724 °C). Total loss: 25.4%.

Selected FT-IR data (in  $\text{cm}^{-1}$ ; from KBr pellets):  $\nu(\text{H}_2\text{O}) = 3500\text{-}3125$ ;  $\nu(-\text{CH}_2-)$  = 3055-2915 $w$ - $m$ ;  $\nu(\text{POH}) = 2844\text{-}2530w\text{-}m$ ;  $\delta(\text{H}_2\text{O}) = 1664m$ ;  $\delta(\text{P}-\text{CH}_2) = 1450m$ , 1431 $m$  and 1417 $m$ ;  $\nu(\text{P}=\text{O}) = 1255\text{-}1109m\text{-}vs$ ;  $\nu(\text{P}-\text{O}) = 1109\text{-}888vs$ ;  $\nu(\text{P}-\text{C}) = 755m$  and 727 $m$ .

## 1.4. Stability Tests of $[\text{La}_2(\text{H}_3\text{nmp})_2(\text{H}_2\text{O})_4]\cdot 4.5\text{H}_2\text{O}$ (1mw)

The bulk  $[\text{La}_2(\text{H}_3\text{tmp})_2(\text{H}_2\text{O})_4]\cdot 4.5\text{H}_2\text{O}$  (**1mw**) material was subjected to both acidic and basic conditions. Typically, 20 mg of **1mw** was placed in 5 mL of distilled water under vigorous magnetic stirring. Different quantities of HCl 6M, concentrated sulphuric acid or NaOH 1M (50, 100, 200, 500 and 1000  $\mu\text{L}$ ) were added dropwise, and the resulting mixture was left under magnetic stirring for a period of 24 h at ambient temperature. After this period, the remaining material was filtered, washed with copious amount of water, and dried in open air. Structural integrity of the materials was assessed using powder X-ray diffraction studies.

## 1.6. Transformation Tests

### 1.6.1 Hydrothermal conditions

In a Teflon-lined Parr Instruments reaction vessel *ca.* 30 mg of  $[\text{La}_2(\text{H}_3\text{tmp})_2(\text{H}_2\text{O})_4]\cdot 4.5\text{H}_2\text{O}$  (**1mw**) were mixed with 4 mL of distilled water and 1 mL of hydrochloric acid 6 M. The vessel was allowed to heat up to *ca.* 100 °C and the reaction took place over a period of 24 h, followed by a slow cooling of the vessel up to ambient temperature (over a period of 48 h). The remaining solid was recovered by vacuum filtration, washed with distilled water and dried in open air. The resulting product was identified as a pure phase identical to  $[\text{La}(\text{H}_3\text{tmp})]\cdot 1.5\text{H}_2\text{O}$  (**2**), previously reported by our group by Cunha-Silva *et al.*<sup>1</sup>

Using a similar experimental procedure to that described in the previous paragraph but using instead 48 h of reaction followed by a quenching of the reaction vessel in cool water, **1mw** was found to be converted into a mixture of  $[\text{La}(\text{H}_3\text{tmp})]\cdot 1.5\text{H}_2\text{O}$  (**2**)<sup>1</sup> and  $[\text{La}(\text{H}_3\text{tmp})]$  (**3**),<sup>2</sup> with the latter material being the predominant phase.

### 1.6.2 One-pot

In this experiment *ca.* 30 mg of **1mw** was mixed with 4.5 mL of distilled water and 0.5 mL of hydrochloric acid 6 M in a round flask under vigorous magnetic stirring at 100 °C. Samples were removed at different reaction times (1, 5, 6, 7, 8 and 24 hours), filtered and washed with copious amounts of water. Phase identification was performed using powder X-ray diffraction studies, showing that **1mw** was fully converted into pure  $[\text{La}(\text{H}_3\text{tmp})]\cdot 1.5\text{H}_2\text{O}$  (**2**).<sup>1</sup>

## 1.7. Single-Crystal X-ray Diffraction Studies: $[\text{La}_2(\text{H}_3\text{tmp})_2(\text{H}_2\text{O})_4]\cdot 4.5\text{H}_2\text{O}$ (**1op**)

Inspection of various batches of the microcrystalline powder isolated from the one-pot synthesis approach was performed using a Stemi 2000 stereomicroscope equipped with Carl Zeiss lenses. This allowed the identification of a rare, larger colourless block (even though the dimensions are only of about

0.08×0.06×0.01 mm) which was investigated using single-crystal X-ray diffraction. This unique block was manually selected and harvested from the batch powder and immersed in highly viscous FOMBLIN Y perfluoropolyether vacuum oil (LVAC 140/13, Sigma-Aldrich).<sup>3</sup> The crystal was then mounted on a Hampton Research CryoLoop and preliminary X-ray diffraction data were collected at 180(2) K on a Bruker D8 QUEST equipped with Mo K $\alpha$  sealed tube ( $\lambda = 0.71073 \text{ \AA}$ ), a multilayer TRIUMPH X-ray mirror, a PHOTON 100 CMOS detector, and a Oxford Instruments Cryostrem 700+ Series low temperature device. The instrument was controlled with the APEX2 software package.<sup>4</sup>

Unit cell indexation using the algorithm implemented in the APEX2 software package did not allow a sensible unit cell identification, mainly because of the presence of various crystal domains and an overall weak diffraction. Figure S1A shows one diffraction image from each of the final performed runs emphasising the weak nature of the diffraction observed from the selected, very small crystallite. Indexation and the calculation of the proper orientation matrix could only be achieved by using data from synchrotron X-ray powder diffraction studies (see the following sections for additional details) in conjunction with the CELL\_NOW command prompt software package: in short, the unit cell search was restricted to narrow values for the cell parameters using as starting premise the data from cell indexation using TOPAS-Academic V5.<sup>5</sup>

Using the monoclinic unit cell derived from synchrotron studies the APEX2 software package calculated a 4-run data collection strategy composed of  $\omega$  and  $\varphi$  scans. The collected data set was processed using the latest integrated plug-in in the controlling software package (SAINT+),<sup>6</sup> and corrected for absorption by the multiscan semi-empirical method implemented in SADABS.<sup>7</sup>

The crystal structure of  $[\text{La}_2(\text{H}_3\text{nmp})_2(\text{H}_2\text{O})_4] \cdot 4.5\text{H}_2\text{O}$  (**1op**) was solved using the algorithm implemented in SHELXT-2014,<sup>8</sup> which allowed the immediate location of almost all of the heaviest atoms composing the molecular unit of the two compounds. The remaining missing non-hydrogen atoms were located from difference Fourier maps calculated from successive full-matrix least-squares refinement cycles on  $F^2$  using the latest SHELXL from the 2014 release.<sup>9</sup>

In general, all non-hydrogen atoms were refined using anisotropic displacement parameters, particularly those composing the one-dimensional neutral hybrid  $\infty^1[\text{La}_2(\text{H}_3\text{nmp})_2(\text{H}_2\text{O})_4]$  polymer. Besides the four coordinated water molecules, 4.5 additional solvent molecules were located in the void spaces of the crystal distributed among six independent crystallographic locations. These uncoordinated solvent molecules were included in the final structural model with isotropic displacement parameters, one for each chemical moiety.

Hydrogen atoms bound to carbon and nitrogen were placed at their idealized positions using the *HFIX 23* or *HFIX 13* in SHELXL-2014. All hydrogen atoms were included in subsequent refinement cycles with isotropic thermal displacements parameters ( $U_{\text{iso}}$ ) fixed at  $1.2 \times U_{\text{eq}}$  of the parent atoms. Hydrogen atoms associated with the water molecules, both of crystallization and coordinated to  $\text{La}^{3+}$ ,

could not be located from difference Fourier maps and no attempts were made to place them in calculated positions. These atoms were, however, included in the empirical formula of the compound (Table S1). Hydrogen atoms associated with the terminal P-OH groups were placed in calculated positions using the *HFIX 147* instruction in SHELXL-2014. To find which groups should be protonated it was necessary to simultaneously take into account the P-O bond lengths and the possibility of forming hydrogen bonds with neighbouring moieties. These hydrogen atoms were refined by assuming isotropic thermal displacements parameters ( $U_{\text{iso}}$ ) fixed at  $1.5 \times U_{\text{eq}}$  of the parent oxygen atoms.

The last difference Fourier map synthesis showed for **1op**, the highest peak ( $1.318 \text{ e}\text{\AA}^{-3}$ ) and the deepest hole ( $-1.071 \text{ e}\text{\AA}^{-3}$ ) located at 1.16 and 1.42 Å from La2 and H3b, respectively.

All structural refinements were performed using the graphical interface ShelXle.<sup>10</sup> Structural drawings have been created using the software package Crystal Impact Diamond.<sup>11</sup> Information concerning crystallographic data collection and structure refinement details is summarized in Table S1. Tables S2 and S3 gather the most significant geometrical parameters of the two crystallographically independent La<sup>3+</sup> coordination spheres.

Crystallographic data (including structure factors) for the crystal structure of compound **1op** have been deposited with the Cambridge Crystallographic Data Centre as supplementary publication data No. CCDC-1040381. Copies of the data can be obtained free of charge on application to CCDC, 12 Union Road, Cambridge CB2 2EZ, U.K. FAX: (+44) 1223 336033. E-mail: deposit@ccdc.cam.ac.uk.

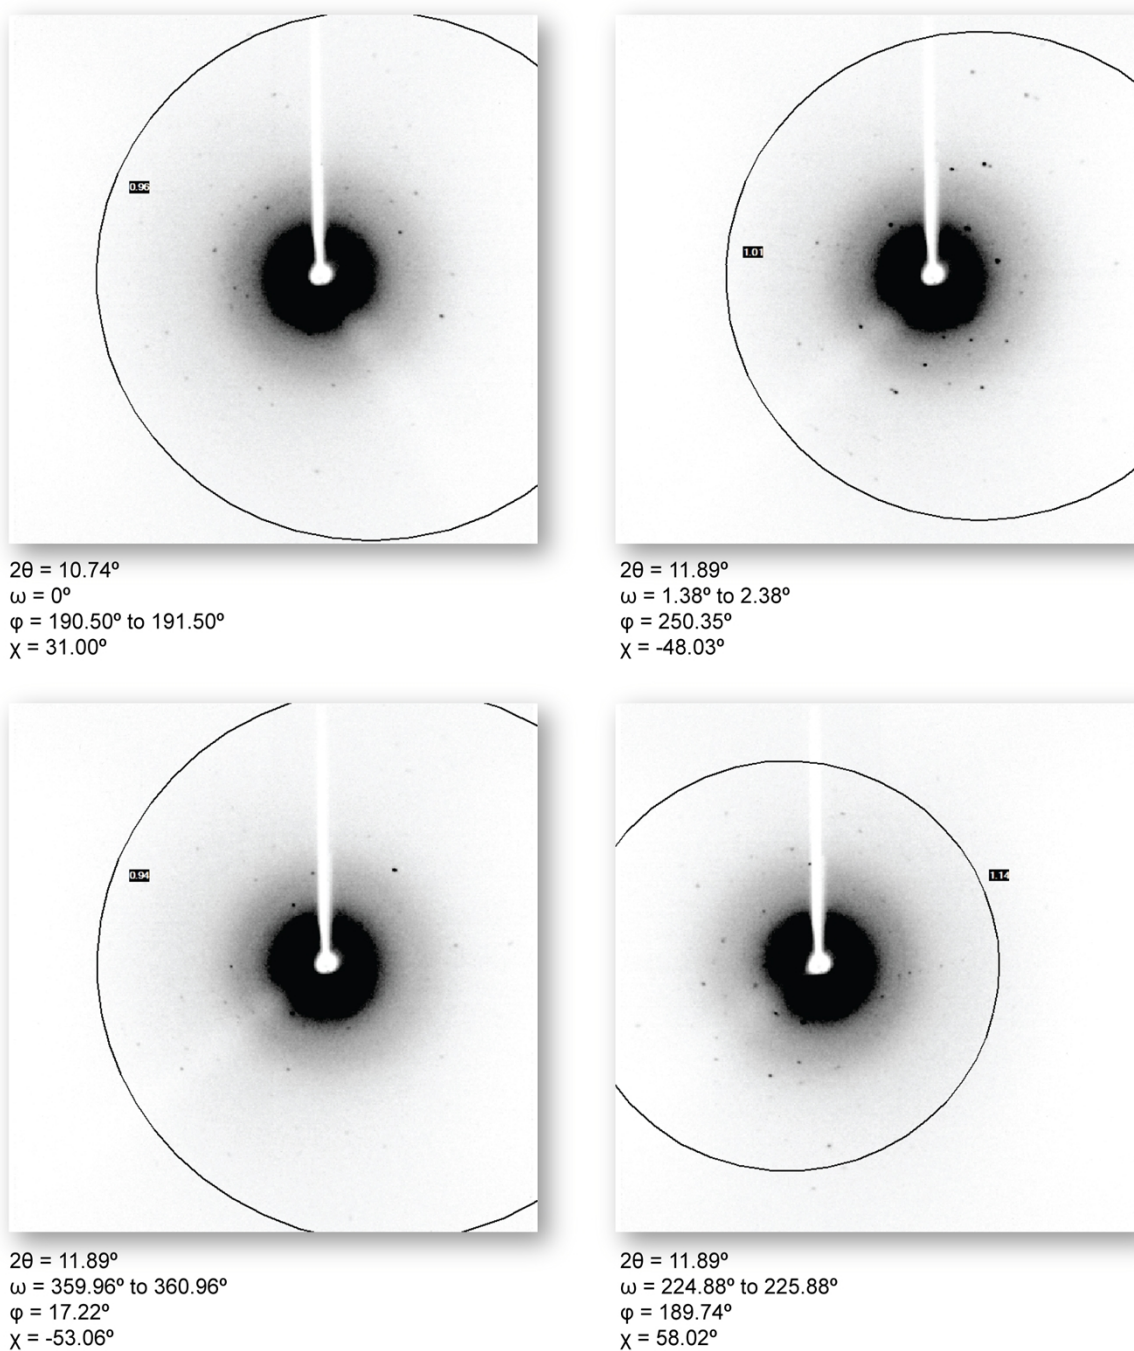

**Figure S1A.** Selected X-ray diffraction frames from the data collection of the crystal structure of  $[\text{La}_2(\text{H}_3\text{tmp})_2(\text{H}_2\text{O})_4]\cdot 4.5\text{H}_2\text{O}$  (**1op**) showing the poor diffracting capabilities of the small selected crystal. As emphasized, reflections are barely observed above the background for a resolution greater than *ca.* 1 Å.

**Table S1.** Crystal and structure refinement data for compound [La<sub>2</sub>(H<sub>3</sub>nmp)<sub>2</sub>(H<sub>2</sub>O)<sub>4</sub>].4.5H<sub>2</sub>O (**1op**).

|                                                                                    |                                                                                                |
|------------------------------------------------------------------------------------|------------------------------------------------------------------------------------------------|
| Formula                                                                            | C <sub>12</sub> H <sub>78</sub> La <sub>4</sub> N <sub>4</sub> O <sub>53</sub> P <sub>12</sub> |
| Formula weight                                                                     | 2054.06                                                                                        |
| Crystal system                                                                     | Monoclinic                                                                                     |
| Space group                                                                        | <i>P</i> 2 <sub>1</sub> / <i>c</i>                                                             |
| <i>a</i> /Å                                                                        | 14.274(4)                                                                                      |
| <i>b</i> /Å                                                                        | 18.624(5)                                                                                      |
| <i>c</i> /Å                                                                        | 12.530(4)                                                                                      |
| $\beta$ /°                                                                         | 115.140(12)                                                                                    |
| Volume/Å <sup>3</sup>                                                              | 3015.3(16)                                                                                     |
| <i>Z</i>                                                                           | 2                                                                                              |
| <i>D</i> <sub>c</sub> /g cm <sup>-3</sup>                                          | 2.262                                                                                          |
| $\mu$ (Mo-K $\alpha$ )/mm <sup>-1</sup>                                            | 3.217                                                                                          |
| Crystal size/mm                                                                    | 0.08×0.06×0.01                                                                                 |
| Crystal type                                                                       | Colourless blocks                                                                              |
| $\theta$ range                                                                     | 3.59 to 25.35                                                                                  |
| Index ranges                                                                       | -17 ≤ <i>h</i> ≤ 17<br>-22 ≤ <i>k</i> ≤ 22<br>-15 ≤ <i>l</i> ≤ 15                              |
| Reflections collected                                                              | 42667                                                                                          |
| Independent reflections                                                            | 5510 [ <i>R</i> <sub>int</sub> = 0.2947]                                                       |
| Completeness to $\theta = 25.24^\circ$                                             | 99.6%                                                                                          |
| Final <i>R</i> indices [ <i>I</i> > 2 $\sigma$ ( <i>I</i> )] <sup><i>a,b</i></sup> | <i>R</i> 1 = 0.0754<br><i>wR</i> 2 = 0.1177                                                    |
| Final <i>R</i> indices (all data) <sup><i>a,b</i></sup>                            | <i>R</i> 1 = 0.1757<br><i>wR</i> 2 = 0.1464                                                    |
| Weighting scheme <sup><i>c</i></sup>                                               | <i>m</i> = 0.0381<br><i>n</i> = 21.7999                                                        |
| Largest diff. peak and hole                                                        | 1.318 and -1.071 eÅ <sup>-3</sup>                                                              |

$$^a R1 = \sum \left| |F_o| - |F_c| \right| / \sum |F_o|$$

$$^b wR2 = \sqrt{\sum \left[ w(F_o^2 - F_c^2) \right]^2 / \sum \left[ w(F_o^2) \right]^2}$$

$$^c w = 1 / \left[ \sigma^2(F_o^2) + (mP)^2 + nP \right] \text{ where } P = (F_o^2 + 2F_c^2) / 3$$

**Table S2.** Selected bond lengths (in Å) and angles (in degrees) for the La1 metal coordination environment present in the single-crystal structure determination of  $[\text{La}_2(\text{H}_3\text{nmp})_2(\text{H}_2\text{O})_4] \cdot 4.5\text{H}_2\text{O}$  (**1op**).<sup>a</sup>

|                          |          |                                        |           |
|--------------------------|----------|----------------------------------------|-----------|
| La1–O1                   | 2.400(9) | La1–O14                                | 2.642(9)  |
| La1–O4                   | 2.532(8) | La1–O14 <sup>i</sup>                   | 2.492(8)  |
| La1–O10                  | 2.534(9) | La1–O1W                                | 2.693(9)  |
| La1–O11 <sup>i</sup>     | 2.429(9) | La1–O2W                                | 2.699(10) |
| La1–O13                  | 2.733(9) |                                        |           |
| O1–La1–O4                | 75.7(3)  | O11 <sup>i</sup> –La1–O10              | 140.1(3)  |
| O1–La1–O10               | 72.1(3)  | O11 <sup>i</sup> –La1–O13              | 99.0(3)   |
| O1–La1–O11 <sup>i</sup>  | 128.3(3) | O11 <sup>i</sup> –La1–O14              | 74.2(3)   |
| O1–La1–O13               | 132.6(3) | O11 <sup>i</sup> –La1–O14 <sup>i</sup> | 73.2(3)   |
| O1–La1–O14               | 134.3(3) | O11 <sup>i</sup> –La1–O1W              | 65.8(3)   |
| O1–La1–O14 <sup>i</sup>  | 79.6(3)  | O11 <sup>i</sup> –La1–O2W              | 71.8(3)   |
| O1–La1–O1W               | 114.6(3) | O14–La1–O13                            | 53.8(3)   |
| O1–La1–O2W               | 63.2(3)  | O14–La1–O1W                            | 111.0(3)  |
| O4–La1–O10               | 77.6(3)  | O14–La1–O2W                            | 142.8(3)  |
| O4–La1–O13               | 66.8(3)  | O14 <sup>i</sup> –La1–O4               | 150.2(3)  |
| O4–La1–O14               | 118.0(3) | O14 <sup>i</sup> –La1–O10              | 79.1(3)   |
| O4–La1–O1W               | 70.6(3)  | O14 <sup>i</sup> –La1–O13              | 122.4(3)  |
| O4–La1–O2W               | 97.1(3)  | O14 <sup>i</sup> –La1–O14              | 69.7(3)   |
| O10–La1–O13              | 72.3(3)  | O14 <sup>i</sup> –La1–O1W              | 136.3(3)  |
| O10–La1–O14              | 69.5(3)  | O14 <sup>i</sup> –La1–O2W              | 86.4(3)   |
| O10–La1–O1W              | 143.9(3) | O1W–La1–O13                            | 79.6(3)   |
| O10–La1–O2W              | 134.8(3) | O1W–La1–O2W                            | 67.4(3)   |
| O11 <sup>i</sup> –La1–O4 | 136.0(3) | O2W–La1–O13                            | 146.7(3)  |

<sup>a</sup> Symmetry transformations used to generate equivalent atoms: (i) 1-x, 1-y, 1-z.

**Table S3.** Selected bond lengths (in Å) and angles (in degrees) for the La2 metal coordination environment present in the single-crystal structure determination of  $[\text{La}_2(\text{H}_3\text{nmp})_2(\text{H}_2\text{O})_4] \cdot 4.5\text{H}_2\text{O}$  (**1op**).<sup>a</sup>

|                                        |          |                           |           |
|----------------------------------------|----------|---------------------------|-----------|
| La2–O4                                 | 2.685(9) | La2–O13                   | 2.524(9)  |
| La2–O5                                 | 2.647(9) | La2–O16                   | 2.458(11) |
| La2–O5 <sup>ii</sup>                   | 2.475(8) | La2–O3W                   | 2.682(10) |
| La2–O7                                 | 2.573(8) | La2–O4W                   | 2.601(10) |
| La2–O8 <sup>ii</sup>                   | 2.493(9) |                           |           |
| O5–La2–O4                              | 54.4(3)  | O8 <sup>ii</sup> –La2–O4W | 70.2(3)   |
| O5–La2–O3W                             | 104.9(3) | O13–La2–O4                | 67.7(3)   |
| O5 <sup>ii</sup> –La2–O4               | 120.6(3) | O13–La2–O5                | 120.8(3)  |
| O5 <sup>ii</sup> –La2–O5               | 68.0(4)  | O13–La2–O7                | 80.7(3)   |
| O5 <sup>ii</sup> –La2–O7               | 78.3(3)  | O13–La2–O3W               | 71.7(3)   |
| O5 <sup>ii</sup> –La2–O13              | 152.4(3) | O13–La2–O4W               | 93.7(3)   |
| O5 <sup>ii</sup> –La2–O8 <sup>ii</sup> | 72.7(3)  | O16–La2–O4                | 131.1(3)  |
| O5 <sup>ii</sup> –La2–O3W              | 134.1(3) | O16–La2–O5                | 133.7(3)  |
| O5 <sup>ii</sup> –La2–O4W              | 89.7(3)  | O16–La2–O7                | 71.2(3)   |
| O7–La2–O4                              | 70.7(3)  | O16–La2–O13               | 77.0(3)   |
| O7–La2–O5                              | 70.6(3)  | O16–La2–O3W               | 121.4(3)  |
| O7–La2–O3W                             | 144.6(3) | O16–La2–O4W               | 66.2(3)   |
| O7–La2–O4W                             | 137.2(3) | O16–La2–O5 <sup>ii</sup>  | 79.4(3)   |
| O8 <sup>ii</sup> –La2–O4               | 101.2(3) | O16–La2–O8 <sup>ii</sup>  | 127.7(3)  |
| O8 <sup>ii</sup> –La2–O5               | 73.2(3)  | O3W–La2–O4                | 78.4(3)   |
| O8 <sup>ii</sup> –La2–O7               | 140.0(3) | O4W–La2–O4                | 145.4(3)  |
| O8 <sup>ii</sup> –La2–O13              | 133.9(3) | O4W–La2–O5                | 141.5(3)  |
| O8 <sup>ii</sup> –La2–O3W              | 62.2(3)  | O4W–La2–O3W               | 67.8(4)   |

<sup>a</sup> Symmetry transformations used to generate equivalent atoms: (ii) -x, 1-y, 1-z.



## 1.8. Synchrotron Powder X-ray Diffraction Studies

High-resolution powder synchrotron X-ray diffraction data for  $[\text{La}_2(\text{H}_3\text{tmp})_2(\text{H}_2\text{O})_4]\cdot 4.5\text{H}_2\text{O}$  (**1mw**) and  $[\text{La}_2(\text{H}_3\text{tmp})_2(\text{H}_2\text{O})_4]\cdot 4.5\text{H}_2\text{O}$  (**1h**) were collected at low temperature (100 K; cooling device from Oxford Instruments) on the powder diffractometer instrument assembled in either the recent ID22 or the ID31 beam line,<sup>12</sup> respectively, at the European Synchrotron Radiation Facility (ESRF), Grenoble, France. The beam lines receive X-rays from the synchrotron source, operating with an average energy of 6 GeV and a current beam of typically 200 mA, from an undulator device. The high signal-to-noise ratio of the data is due to the high brilliance of the synchrotron beam in combination with a Si (111) crystal multi-analyser.

The monochromatic wavelengths were fixed at 0.495958(7) or 0.39981(1) Å for ID22 or ID31, respectively, and calibrated against the Si standard NIST 640c [certified cell parameter  $a = 5.4311946(92)$  Å]. Hard X-rays were selected for data collection of both compounds in order to significantly reduce radiation damage, an occurrence observed in previous investigations using related materials but in different experimental conditions. Nevertheless, even at low temperature, the high brilliance of the synchrotron source led to visible damage on the samples. To minimize such effects consecutive data collections were performed on fresh portions of the sample by translating the capillary by *ca.* 1.3 mm.

Fine powdered samples of **1mw** and **1h** were placed inside a Hilgenberg borosilicate glass capillary (*ca.* 0.9 mm of diameter) which was spun during data collection to improve powder averaging over the individual crystallites, ultimately removing eventual textural effects such as preferential orientation. Data were collected in continuous mode with accumulation times increasing with the scattering angle. The counts of the six detectors (covering roughly  $5.5^\circ 2\theta$ ) were rebinned and normalised to give the equivalent step scans ( $0.002^\circ$ ) suitable for further structural analyses.

The collected high-resolution powder X-ray diffraction patterns were indexed using the LSI-Index algorithm implemented in TOPAS-Academic V5,<sup>5</sup> and a whole-powder-pattern Pawley fit permitted to unequivocally confirm the monoclinic  $P2_1/c$  space group as the most suitable for both compounds, in good agreement with the single-crystal structure determination.

Rietveld structural refinements<sup>13</sup> for both **1mw** and **1h** used as started premise the atomic coordinates and model refined for the compound **1op**. Calculations were performed with TOPAS-Academic V5<sup>14</sup> using a Chebychev polynomial throughout the entire angular range to model the background contribution. The peak shapes for the powder pattern were described using the fundamental parameters approach,<sup>15</sup> with the preferential orientation effects being modelled using a March-Dollase model along the (011) pole.<sup>16</sup> Table S4 gathers all the details pertaining to the ID22 and ID31 synchrotron X-ray data collection, crystal data and structure refinement details for both  $[\text{La}_2(\text{H}_3\text{tmp})_2(\text{H}_2\text{O})_4]\cdot 4.5\text{H}_2\text{O}$  (**1mw**) and  $[\text{La}_2(\text{H}_3\text{tmp})_2(\text{H}_2\text{O})_4]\cdot 4.5\text{H}_2\text{O}$  (**1h**).

**Table S4.** X-ray data collection, crystal data and structure refinement details for [La<sub>2</sub>(H<sub>3</sub>nmp)<sub>2</sub>(H<sub>2</sub>O)<sub>4</sub>]<sub>2</sub>·4.5H<sub>2</sub>O (**1mw**) and [La<sub>2</sub>(H<sub>3</sub>nmp)<sub>2</sub>(H<sub>2</sub>O)<sub>4</sub>]<sub>2</sub>·4.5H<sub>2</sub>O (**1h**).

|                                                                                                                  | <b>1mw</b>                                                                                     | <b>1h</b>                                                                                      |
|------------------------------------------------------------------------------------------------------------------|------------------------------------------------------------------------------------------------|------------------------------------------------------------------------------------------------|
| <i>Data Collection</i>                                                                                           |                                                                                                |                                                                                                |
| Diffraction                                                                                                      | ID22 beam line – ESRF, France                                                                  | ID31 beam line – ESRF, France                                                                  |
| Wavelength (Å)                                                                                                   | 0.495958(7)                                                                                    | 0.39981(1)                                                                                     |
| Temperature (K)                                                                                                  | 100                                                                                            | 100                                                                                            |
| Geometry                                                                                                         | Debye-Scherrer                                                                                 | Debye-Scherrer                                                                                 |
| 2θ range (°)                                                                                                     | 2.000 to 20.000                                                                                | 1.500 to 16.000                                                                                |
| <i>Unit Cell</i>                                                                                                 |                                                                                                |                                                                                                |
| Formula                                                                                                          | C <sub>12</sub> H <sub>44</sub> La <sub>4</sub> N <sub>4</sub> O <sub>53</sub> P <sub>12</sub> | C <sub>12</sub> H <sub>44</sub> La <sub>4</sub> N <sub>4</sub> O <sub>53</sub> P <sub>12</sub> |
| Crystal system                                                                                                   | Monoclinic                                                                                     | Monoclinic                                                                                     |
| Space group                                                                                                      | <i>P</i> 2 <sub>1</sub> / <i>c</i>                                                             | <i>P</i> 2 <sub>1</sub> / <i>c</i>                                                             |
| <i>a</i> /Å                                                                                                      | 14.344(4)                                                                                      | 14.3310(4)                                                                                     |
| <i>b</i> /Å                                                                                                      | 18.558(5)                                                                                      | 18.5148(6)                                                                                     |
| <i>c</i> /Å                                                                                                      | 12.468(4)                                                                                      | 12.4607(4)                                                                                     |
| β/°                                                                                                              | 115.3872(13)                                                                                   | 115.526(3)                                                                                     |
| Volume/Å <sup>3</sup>                                                                                            | 2998.5(15)                                                                                     | 2983.53(17)                                                                                    |
| <i>Z</i>                                                                                                         | 2                                                                                              | 2                                                                                              |
| <i>D<sub>c</sub></i> /g cm <sup>-3</sup>                                                                         | 2.246(1)                                                                                       | 2.257(1)                                                                                       |
| <i>Profile parameters</i>                                                                                        |                                                                                                |                                                                                                |
| Profile function                                                                                                 | Fundamental parameters approach                                                                | Fundamental parameters approach                                                                |
| Zero shift [2θ°]                                                                                                 | 0.008(23)                                                                                      | 0.004(96)                                                                                      |
| <i>Refinement details</i>                                                                                        |                                                                                                |                                                                                                |
| No. of independent reflections                                                                                   | 1162                                                                                           | 1154                                                                                           |
| No. of global refined parameters                                                                                 | 189                                                                                            | 163                                                                                            |
| <i>Reliability Factors for data points with Bragg contribution (conventional – not corrected for background)</i> |                                                                                                |                                                                                                |
| <i>R<sub>p</sub></i>                                                                                             | 10.29                                                                                          | 3.70                                                                                           |
| <i>R<sub>wp</sub></i>                                                                                            | 13.50                                                                                          | 5.39                                                                                           |
| <i>R<sub>exp</sub></i>                                                                                           | 0.95                                                                                           | 1.18                                                                                           |
| GOF                                                                                                              | 14.17                                                                                          | 4.56                                                                                           |
| <i>Structure Reliability Factors</i>                                                                             |                                                                                                |                                                                                                |
| <i>R<sub>Bragg</sub></i>                                                                                         | 4.80                                                                                           | 1.55                                                                                           |

$$R_p = \frac{\sum_i |y_{i,o} - y_{i,c}|}{\sum_i |y_{i,o}|}; R_{wp} = \sqrt{\frac{\sum_i w_i (y_{i,o} - y_{i,c})^2}{\sum_i w_i (y_{i,o})^2}}; R_{Bragg} = \frac{\sum_n |I_{n,o} - I_{n,c}|}{\sum_n I_{n,o}};$$

$$R_{exp} = \sqrt{\frac{(n-p)}{\sum_i w_i (y_{i,o})^2}}; GOF = \frac{R_{wp}}{R_{exp}}$$

where  $y_{i,o}$  and  $y_{i,c}$  are the observed and calculated profile intensities,  $I_{n,o}$  and  $I_{n,c}$  the observed and calculated intensities, respectively. The summations run over  $i$  data points or  $n$  independent reflections. Statistical weights  $w_i$  are usually taken as  $1/y_{i,o}$ .

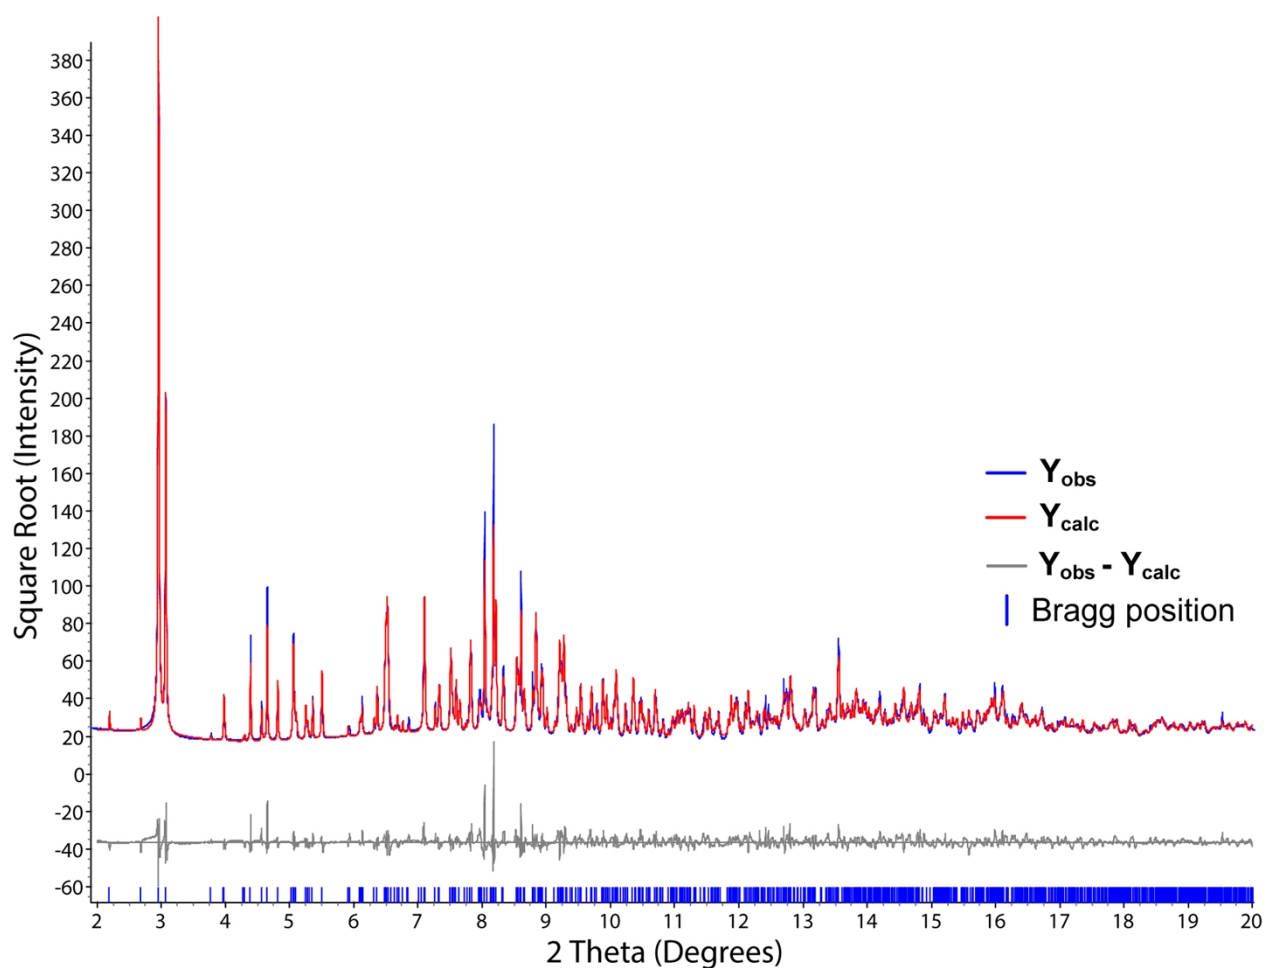

**Figure S1B** - Final Rietveld plot (synchrotron X-ray diffraction data from ID22 beam line at the ESRF – Grenoble, France) of  $[La_2(H_3nmp)_2(H_2O)_4] \cdot 4.5H_2O$  (**1mw**). Observed data points are indicated as a blue line, the best fit profile (upper trace) and the difference pattern (lower trace) are drawn as solid red and grey lines, respectively. Blue vertical bars indicate the angular positions of the allowed Bragg reflections. Refinement details are given in Table S4.

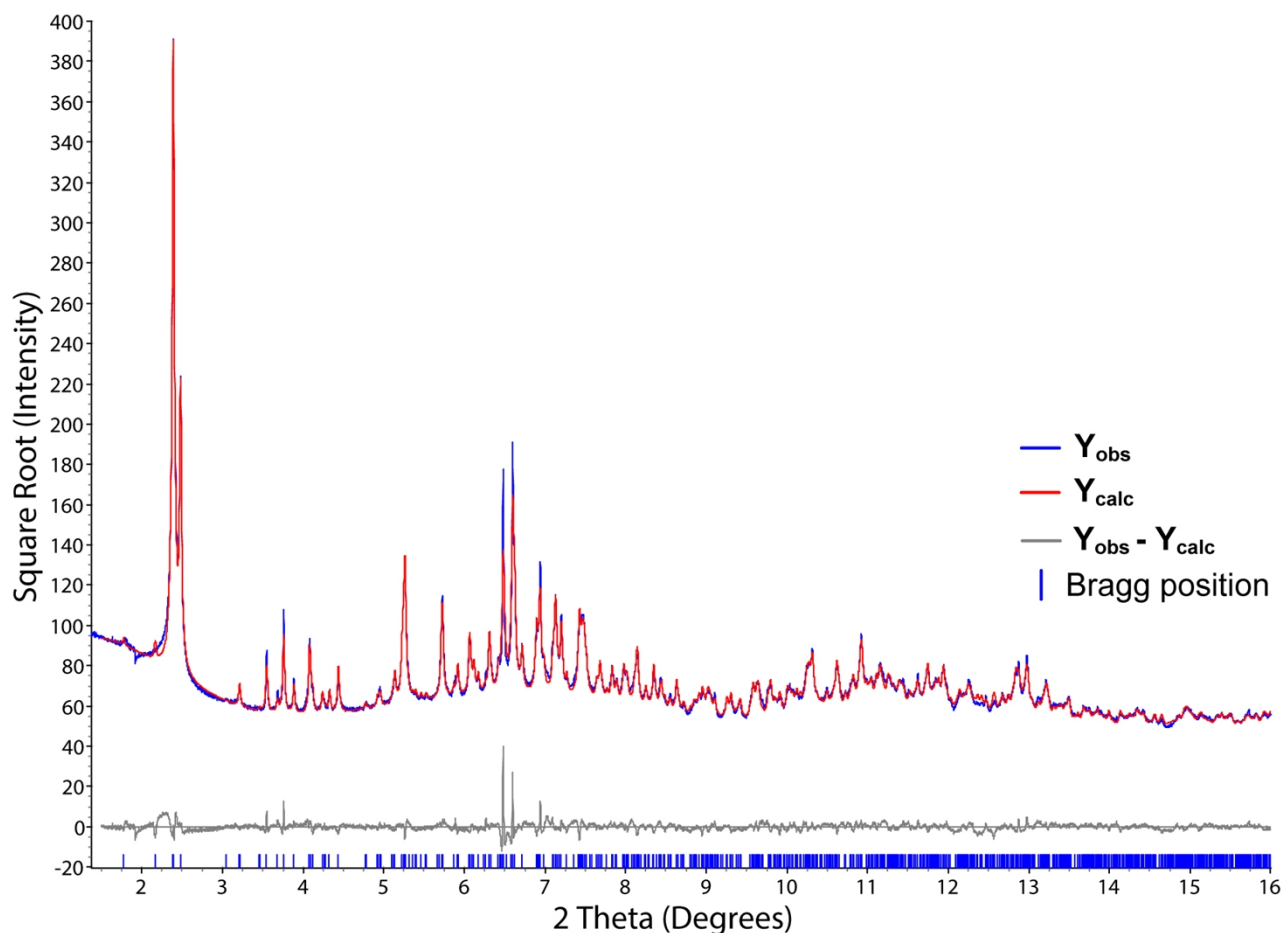

**Figure S1C** - Final Rietveld plot (synchrotron X-ray diffraction data from ID31 beam line at the ESRF – Grenoble, France) of [La<sub>2</sub>(H<sub>3</sub>nmp)<sub>2</sub>(H<sub>2</sub>O)<sub>4</sub>]·4.5H<sub>2</sub>O (**1h**). Observed data points are indicated as a blue line, the best fit profile (upper trace) and the difference pattern (lower trace) are drawn as solid red and grey lines, respectively. Blue vertical bars indicate the angular positions of the allowed Bragg reflections. Refinement details are given in Table S4.

## 1.9. Heterogeneous Catalysis

A 5 mL borosilicate batch reactor, equipped with a magnetic stirrer (800 rpm) and a valve for sampling, was charged with 1.5 mL of methanol or ethanol, 0.4 M of the substrate (styrene oxide – PhEtO - or benzaldehyde - BA) and the catalyst. The catalysts employed in the present work were:  $[\text{La}_2(\text{H}_3\text{nmp})_2(\text{H}_2\text{O})_4] \cdot 4.5\text{H}_2\text{O}$  (**1mw**) ( $3.3\text{-}20 \text{ g}^1 \text{ L}^{-1}$ ) and the primary building blocks of the hybrid material, the organic ligand ( $\text{H}_6\text{nmp} - \text{NC}_3\text{H}_6(\text{PO}_3\text{H}_2)_3$ ) and the lanthanide precursor  $\text{La}_2\text{O}_3$  (3.3 mM). Reactions were carried out under atmospheric air, with the batch reactors immersed in an external thermostated oil bath (35 °C). Prior to reuse, the solid catalyst **1mw** was separated from the reaction mixture by centrifugation at 3500 rpm, washed with methanol and dried under atmospheric conditions.

The leaching test was carried out for **1mw** by heating a stirred suspension of the hybrid material ( $3.3 \text{ g}_1 \text{ L}^{-1}$ ) in methanol and PhEtO (0.4 M), for 15 min at 35 °C, and subsequently filtering the solid at the same temperature through a  $0.20 \mu\text{m}$  PVDF w/ GMF Whatman membrane. The obtained filtrate was transferred to a pre-heated (35 °C) batch reactor and left to react at the same temperature under constant stirring. For comparison, the reaction of PhEtO was also carried in the presence of ethanol under the same experimental conditions.

The progress of the catalytic reactions was monitored using a Varian 3800 GC equipped with a capillary column (Chrompack, CP-SIL 5 CB, 50 m x 0.32 mm x 0.5 mm) and a flame ionization detector. Hydrogen was used as the carrier gas. The identification of the reaction products was carried out by GC-MS (Trace GC 2000 Series (Thermo Quest CE Instruments) - DSQ II (Thermo Scientific)), using He as the carrier gas.

## 2. Structural Studies

### 2.1. 1mw

#### 2.1.1. Electron Microscopy Studies: EDS Mapping

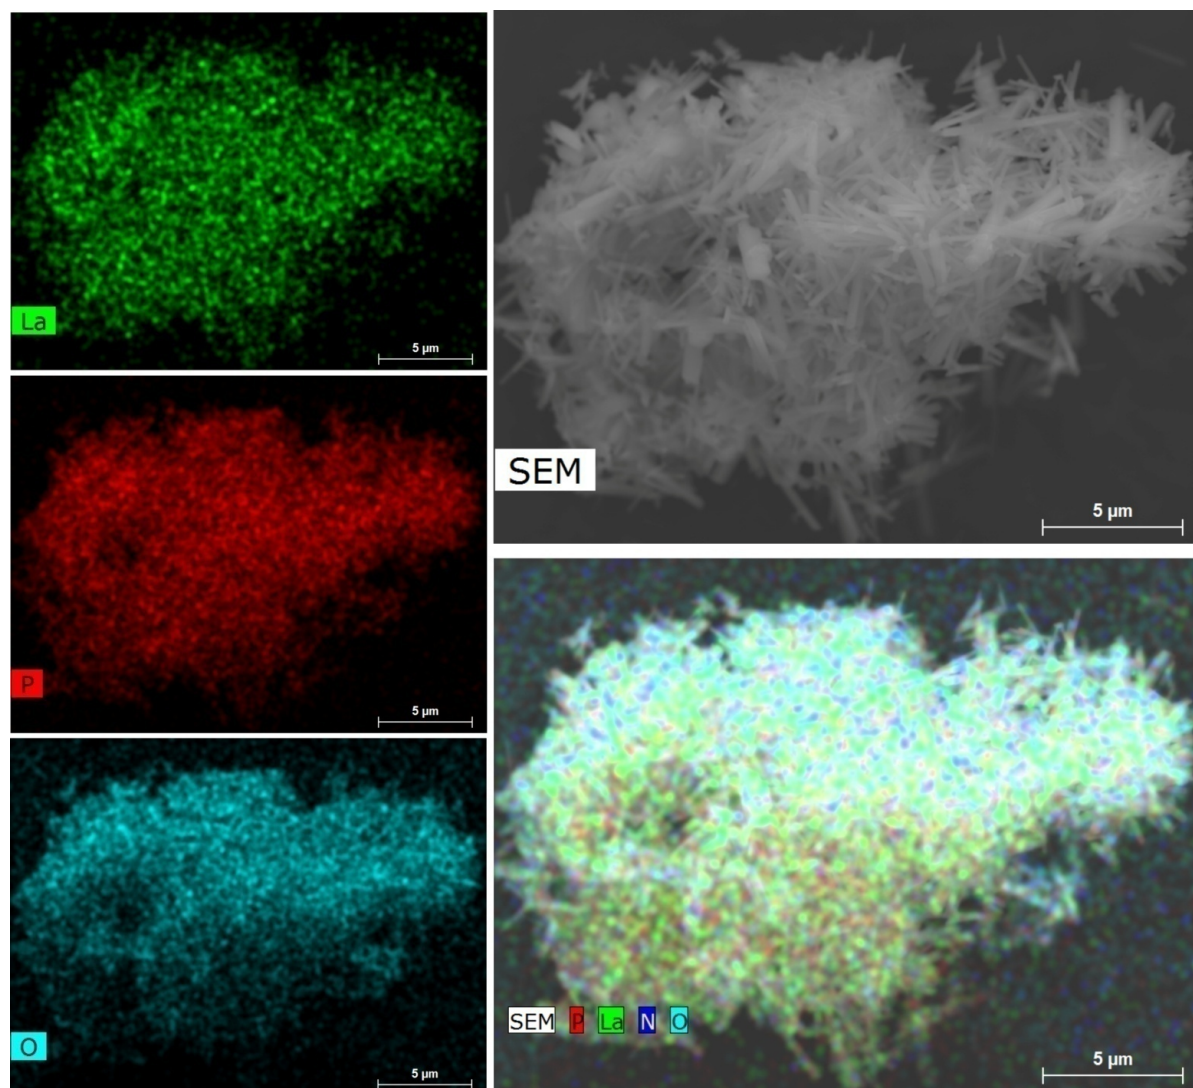

**Figure S2.** Electron microscopy EDS mapping studies of a representative portion of the  $[\text{La}_2(\text{H}_3\text{nmp})_2(\text{H}_2\text{O})_4] \cdot 4.5\text{H}_2\text{O}$  (**1mw**) bulk material.

Electron microscopy studies on the bulk  $[\text{La}_2(\text{H}_3\text{nmp})_2(\text{H}_2\text{O})_4] \cdot 4.5\text{H}_2\text{O}$  (**1mw**) material reveal that the material is uniformly composed of very thin (*i.e.*, nanometer size in at least one direction) needle-like crystallites with length up to 10  $\mu\text{m}$  (Figure S2). EDS mapping studies show a uniform distribution of the heaviest elements among the bulk sample, ultimately evidencing the presence of a pure phase, as also revealed from the performed X-ray diffraction and solid-state NMR studies.

2.1.2.  $^{31}\text{P}$  Solid-State Nuclear Magnetic Resonance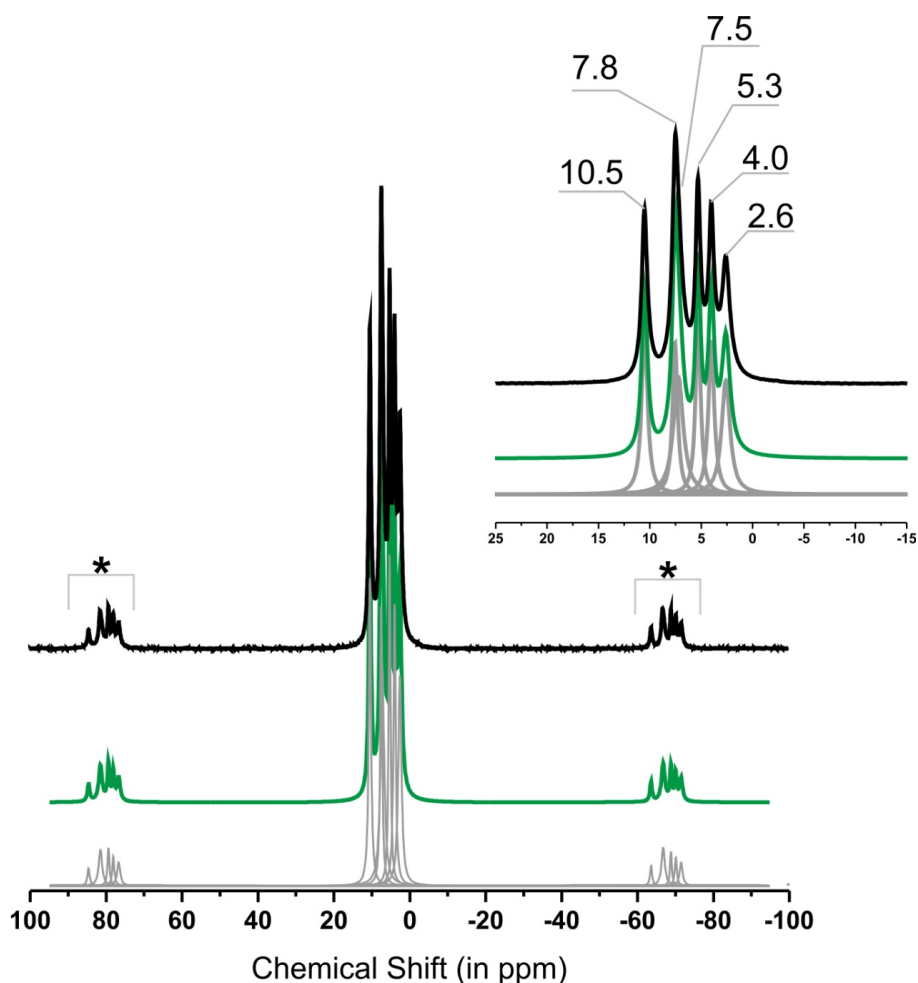

**Figure S3.**  $^{31}\text{P}$  HPDEC MAS spectrum of  $[\text{La}_2(\text{H}_3\text{nmp})_2(\text{H}_2\text{O})_4] \cdot 4.5\text{H}_2\text{O}$  (**1mw**). Spinning sidebands are denoted using an asterisk. Peak deconvolution and integration throughout the entire spectral range (*i.e.*, including the spinning sidebands) gives a ratio of *ca.* 0.89 : 1.16 : 1.25 : 0.88 : 0.86 : 0.96 for the isotropic resonances at *ca.* 10.5, 7.8, 7.5, 5.3, 4.0 and 2.6 ppm, respectively. The green line depicts the overall (*i.e.*, sum) data fit while the individual grey lines correspond to the fits of each single peaks.

The presence of diamagnetic  $\text{La}^{3+}$  metallic centers in the structure of **1mw** permitted the use of solid-state NMR techniques to probe the composition of the asymmetric unit. Due to the overall poor crystal quality, as described in the technical section dedicated to X-ray diffraction, this solid-state NMR data was of crucial importance to unequivocally assess the number of crystallographically independent organic ligands in the asymmetric unit.

The HPDEC  $^{31}\text{P}$  MAS spectrum of **1mw** shows, in the isotropic region, five well-resolved sharp peaks centered at *ca.* 2.6, 4.0, 5.3, 7.5 and 10.5 ppm (Figure S3). One of the resonances has a small visible shoulder, which is more noticeable in the spinning sidebands, referring to a 6<sup>th</sup> resonance centred at *ca.* 7.8 ppm. In short, the existence of six crystallographically independent phosphorus sites agrees well with the selected space group and the undertaken X-ray crystallographic studies.

### 2.1.3. Thermogravimetry and Thermodiffractometry

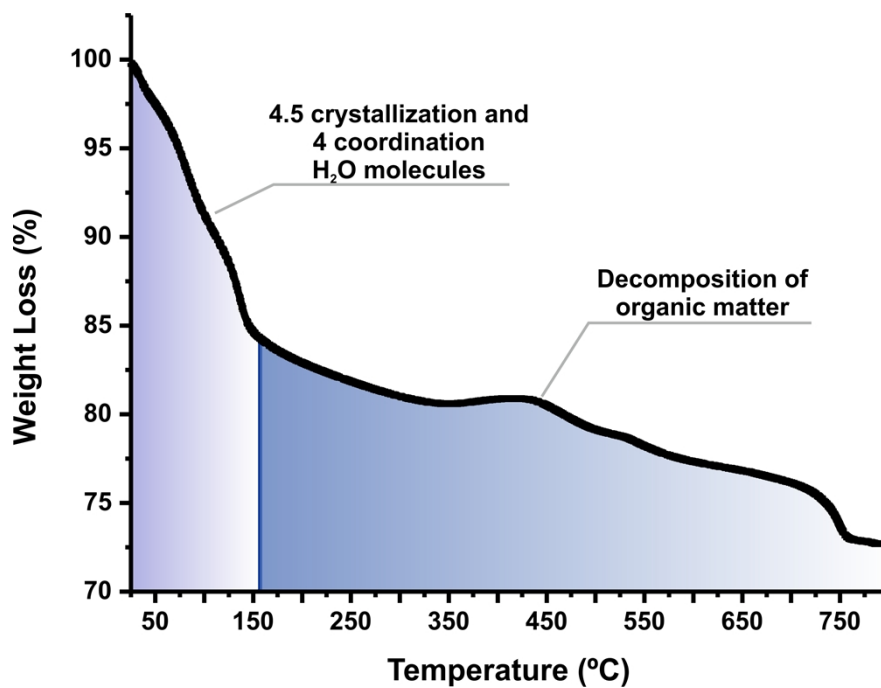

**Figure S4.** Thermogram of [La<sub>2</sub>(H<sub>3</sub>nmp)<sub>2</sub>(H<sub>2</sub>O)<sub>4</sub>]·4.5H<sub>2</sub>O (**1h**) collected between ambient temperature and *ca.* 800 °C with a heating rate of 5 °C/min.



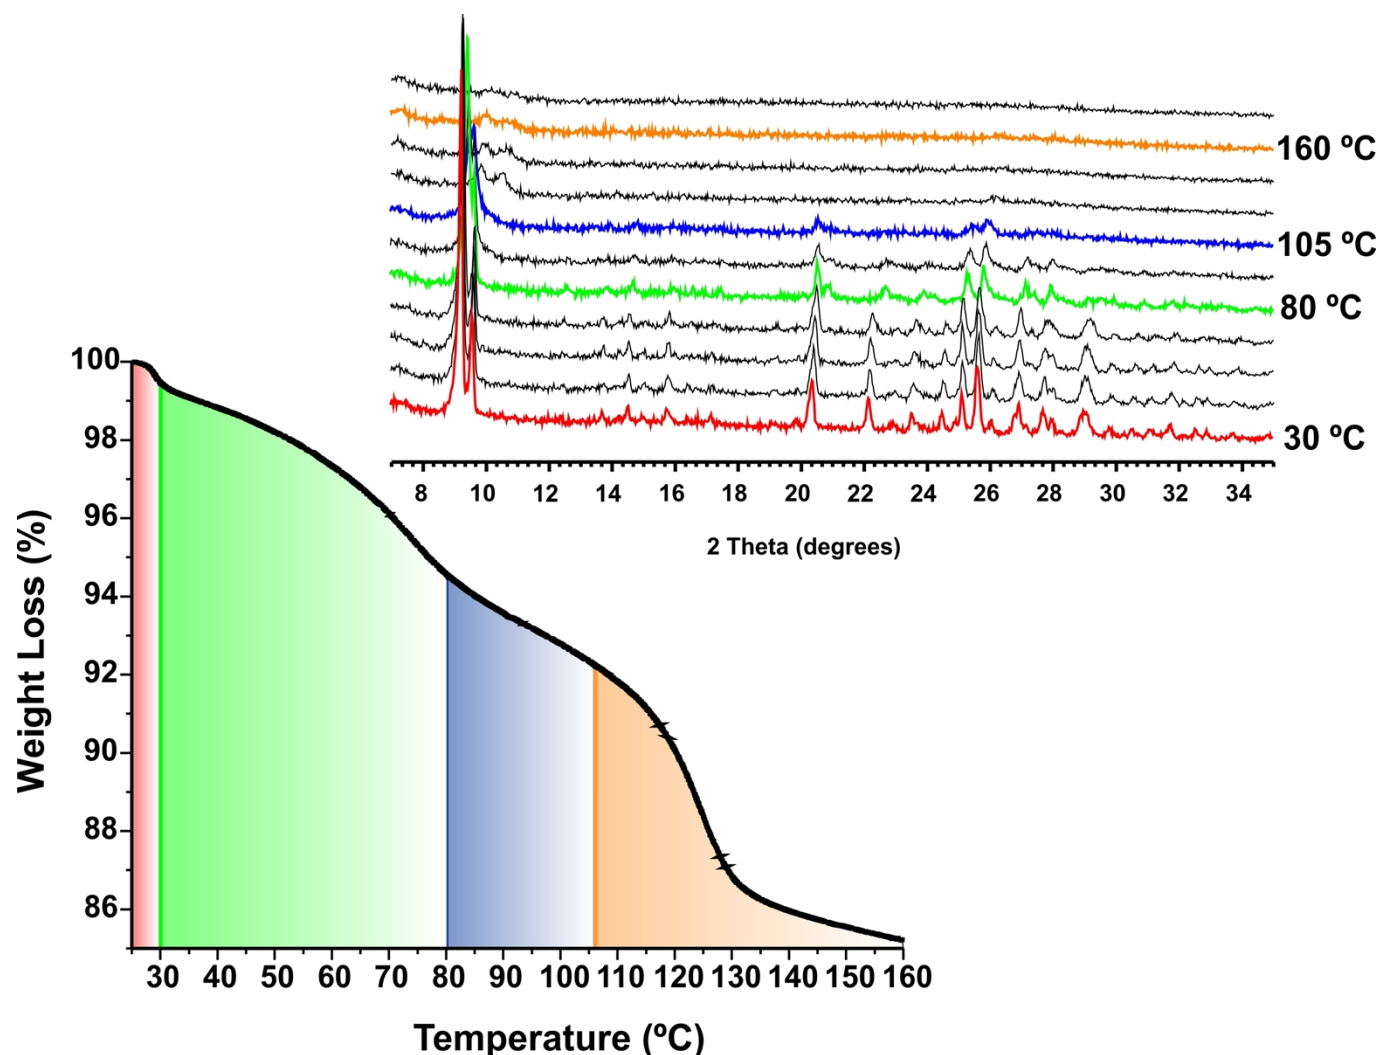

**Figure S5.** Correspondence between the thermogram of  $[\text{La}_2(\text{H}_3\text{nmp})_2(\text{H}_2\text{O})_4]\cdot 4.5\text{H}_2\text{O}$  (**1mw**), collected between ambient temperature and *ca.* 160 °C (heating rate of 1 °C/min), with variable temperature powder X-ray diffraction studies.

The thermal stability of  $[\text{La}_2(\text{H}_3\text{nmp})_2(\text{H}_2\text{O})_4]\cdot 4.5\text{H}_2\text{O}$  (**1h**) was investigated between ambient temperature and *ca.* 800 °C as depicted in Figure S4. The presence of a large quantity and type of water molecules in the material prompted us to investigate the same behaviour in more detail between the ambient temperature and 160 °C by employing a much slower heating rate (Figure S5). In addition, for this latter temperature interval the overall crystallinity and phase identification of the bulk material was also evaluated by employing *in situ* variable-temperature powder X-ray diffraction studies (VTPXRD; Figure S5 - top).

The material does not exhibit markedly visible and separated regions of thermal stability: transformations occur continuously between ambient temperature and *ca.* 800 °C. Nevertheless, it is clear that the thermal decomposition of the compound can be divided into two main stages: the first, corresponding to the release of all water molecules, occurs essentially at very low temperatures; the second, continuous over the overall temperature range, corresponds to the thermal decomposition of the

organic component. For the first stage a second thermogravimetric study has been performed, with a much slower heating ramp in order to try to fully understand the process of release of the water molecules (Figure S5). Between ambient temperature and *ca.* 190 °C, **1mw** loses approximately 14.94% of mass which agrees well with the calculated value for the liberation of all water molecules, both of crystallization and coordinated (calculated value of *ca.* 14.91%). As depicted in Figure S5 (*bottom*), the release of these water molecules occurs in three-to-four consecutive steps without the presence of any plateau. Because of this it is difficult to assign each release step to a given family of water molecules. However, due to the very low temperature at which these moieties start to be liberated (as low as ambient temperature), it is feasible to assume that most of the uncoordinated molecules are released in a first stage. A similar behaviour was observed for the materials prepared using the alternative synthetic approaches: **1h** releases *ca.* 15.91% of mass up to *ca.* 160 °C, and **1op** *ca.* 15.44% up to a temperature of *ca.* 180 °C (see Experimental Section and Figure S8).

Variable-temperature powder X-ray diffraction studies on **1mw** corroborate the aforementioned assumption concerning the order of release of the water molecules (Figure S5 – *top*): up to a temperature of *ca.* 90 °C, the material retains some degree of crystallinity, strongly indicating that the released water molecules are not structurally very significant for the integrity of the 1D coordination polymer; when the coordinated water molecules start to be released, the structure collapses and the material becomes amorphous, as clearly observed for the study performed at *ca.* 160 °C.

Upon release of all water molecules, and after the compound becomes fully amorphous, the various weight losses observed are attributed to the slow decomposition of the organic component.

## 2.2. Bulk 1mw vs. 1h vs. 1op

### 2.2.1. Powder X-ray Diffraction and SEM studies

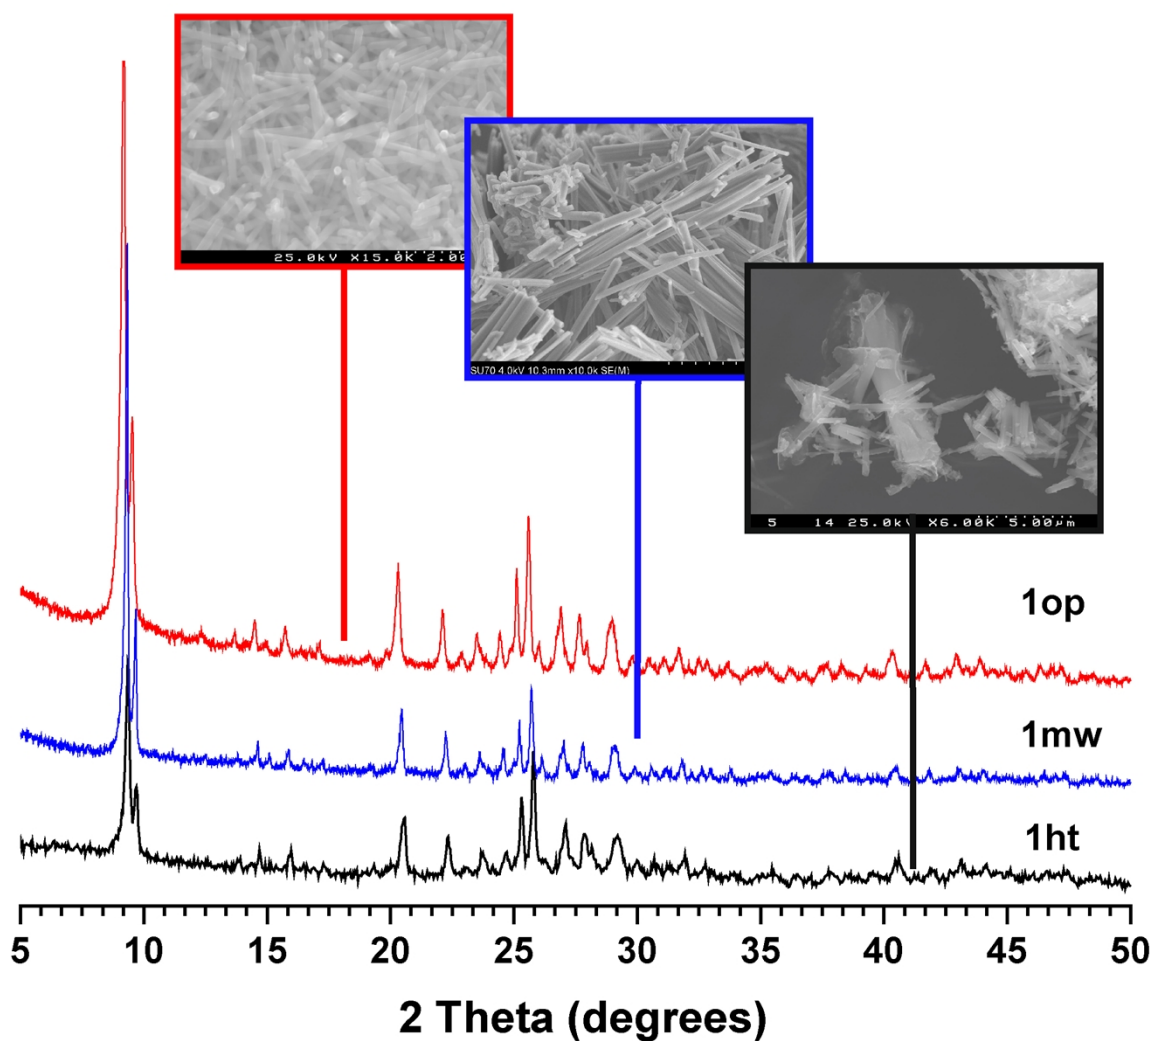

**Figure S6.** Comparison between the powder X-ray diffraction patterns and SEM images of the bulk  $[\text{La}_2(\text{H}_3\text{nmp})_2(\text{H}_2\text{O})_4] \cdot 4.5\text{H}_2\text{O}$  material obtained using the three methods described in the experimental section: **1mw**, **1op** and **1h**.

## 2.2.2. FT-IR Spectroscopy Studies

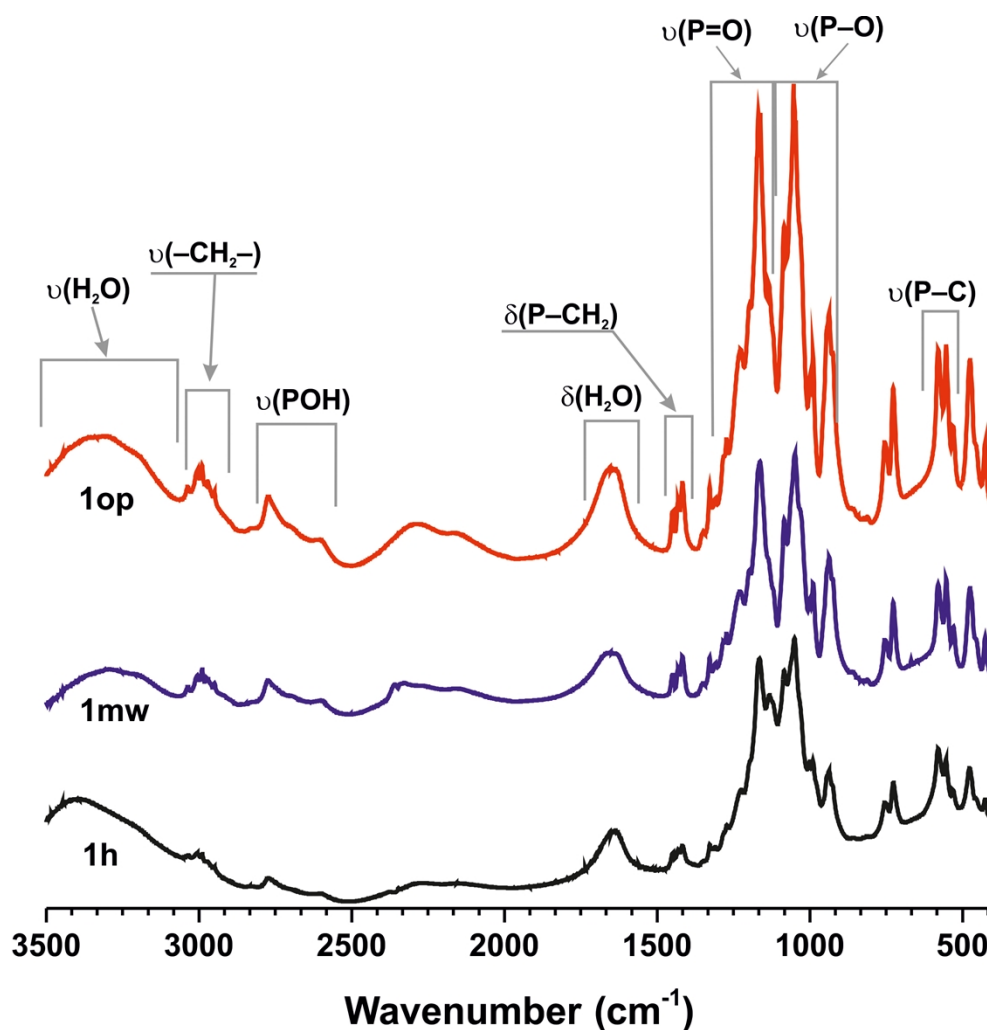

**Figure S7.** Comparison between the FT-IR spectra of the bulk  $[\text{La}_2(\text{H}_3\text{nmp})_2(\text{H}_2\text{O})_4] \cdot 4.5\text{H}_2\text{O}$  materials obtained using the three methods described in the experimental section: **1mw**, **1op** and **1h**.

The FT-IR spectra of the bulk  $[\text{La}_2(\text{H}_3\text{nmp})_2(\text{H}_2\text{O})_4] \cdot 4.5\text{H}_2\text{O}$  materials is identical for the three employed synthetic methods as depicted in Figure S7, with the most striking bands being clearly associated with the chemical moieties composing the asymmetric unit.<sup>17</sup> The presence of a large number and diversity of water molecules is clearly observed in the spectra, with the existence of broad bands in the *ca.* 3500-3000  $\text{cm}^{-1}$  and 1750-1650  $\text{cm}^{-1}$  spectral ranges, attributed to the stretching and deformation vibrational modes of these chemical entities, respectively. The spectral region below *ca.* 1200  $\text{cm}^{-1}$  is rich in various vibrational modes attributed to the coordinated phosphonate groups, particularly the symmetric and antisymmetric  $\nu(\text{P}=\text{O})$  modes. The presence of protonated POH groups from the organic linker is also markedly visible in the *ca.* 2850-2500  $\text{cm}^{-1}$  spectral region, alongside with the  $-\text{CH}_2-$  moieties which give rise to a number of stretching vibrational modes in the *ca.* 3050-2900  $\text{cm}^{-1}$  spectral region.

### 2.2.3. Thermogravimetry

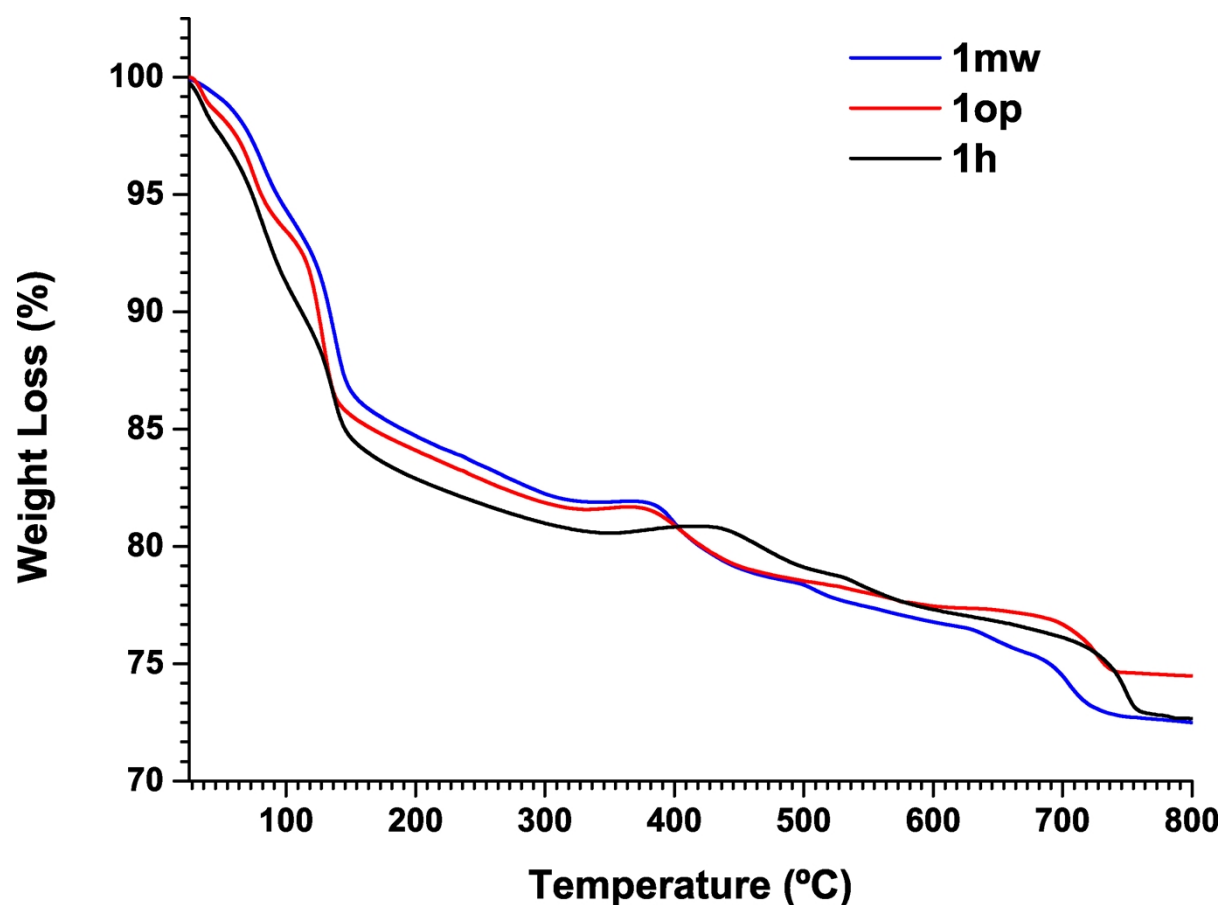

**Figure S8.** Comparison between the thermograms of the bulk  $[\text{La}_2(\text{H}_3\text{nmp})_2(\text{H}_2\text{O})_4]\cdot 4.5\text{H}_2\text{O}$  materials obtained using the three methods described in the experimental section: **1mw**, **1op** and **1h**.

Thermogravimetric studies for the bulk  $[\text{La}_2(\text{H}_3\text{nmp})_2(\text{H}_2\text{O})_4]\cdot 4.5\text{H}_2\text{O}$  material prepared using the three employed synthetic approaches show that the thermal behaviour is very similar for all compounds. The small differences observed are attributed to the effect of the distinct crystallite size as shown in Figure S6, which has some influence in the kinetics of release of the various chemical components, particularly the water molecules (both of crystallization and coordinated).

## 2.2.4. Crystal structure overlay

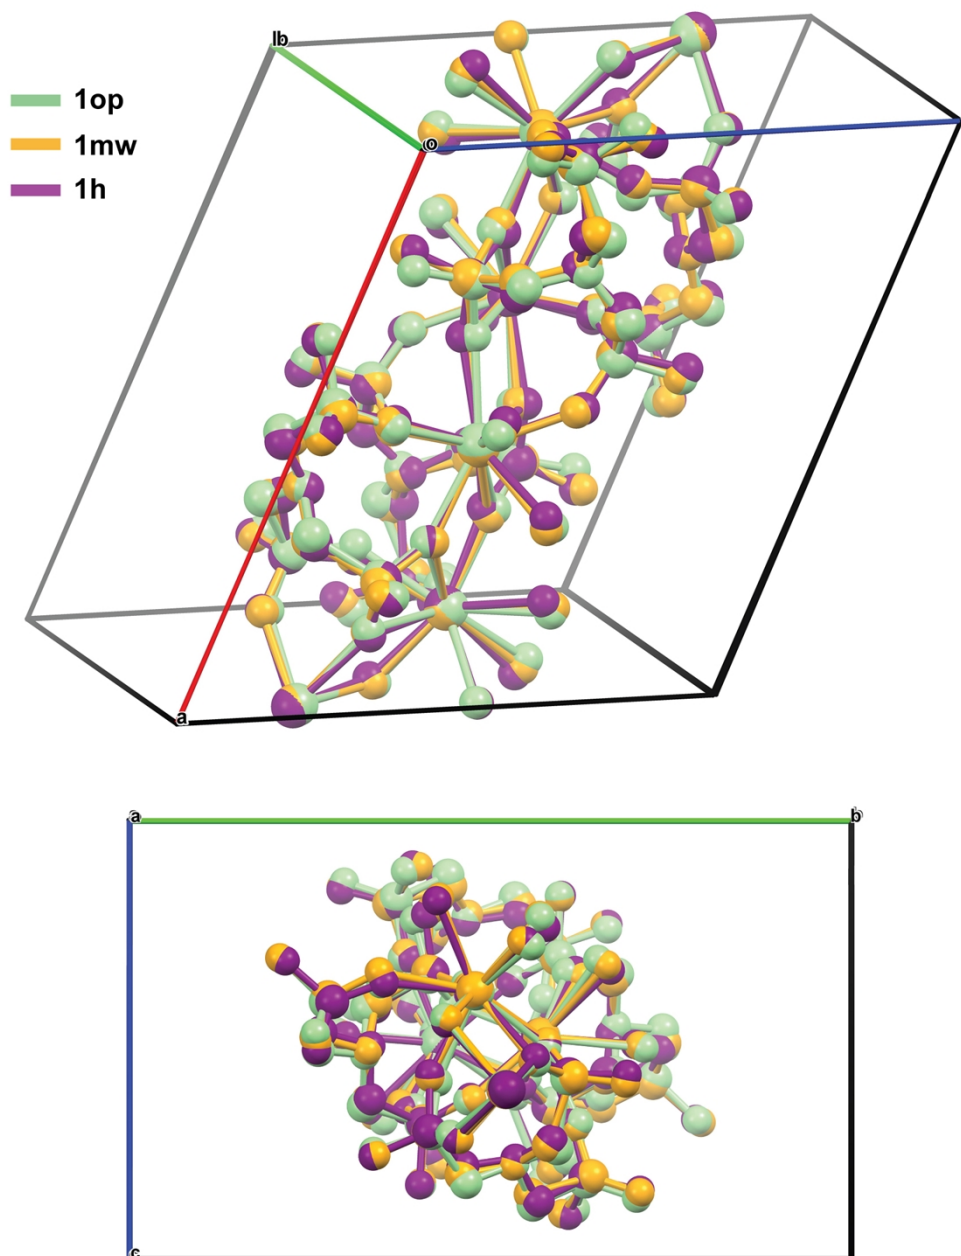

**Figure S9.** Unit cell and structure overlay of the  $\infty_1[\text{La}_2(\text{H}_3\text{nmp})_2(\text{H}_2\text{O})_4]$  one-dimensional polymers present in the crystal structure determinations of **1mw**, **1h** and **1op**. Images produced using the software package Mercury.

### 3. Heterogeneous Catalysis

#### 3.1. Epoxide Ring Opening

$[\text{La}_2(\text{H}_3\text{nmp})_2(\text{H}_2\text{O})_4] \cdot 4.5\text{H}_2\text{O}$  (**1mw**) exhibited very high catalytic activity and excellent regioselectivity in the alcoholysis of styrene oxide (PhEtO) with methanol or ethanol (Figure S10), giving the corresponding  $\beta$ -alkoxy alcohol products with 100% selectivity and 99% yield at 30 min (2-methoxy-2-phenylethanol, MeOPhEtOH) and 3 h (2-ethoxy-2-phenylethanol, EtOPhEtOH), respectively (Table S5). The mechanism of the reaction can be described as a nucleophilic substitution under acidic conditions. The Brønsted acidity associated with the free phosphonate groups in **1mw** can favour the protonation of the oxygen atom of the epoxide group. This leads to favourable nucleophilic attack of the alcohol reagent at the more substituted carbon atom of the epoxide group, leading to the beta-alkoxy alcohol product. A possible reaction mechanism is hypothesized in Scheme S1. No secondary reaction products originating from the decomposition of the reagents were detected, suggesting an excellent efficiency for this catalytic system. In the absence of the catalyst, no reaction of PhEtO occurred. Noteworthy, a six-fold decrease in the amount of **1mw** from 20 to 3.3  $\text{g}_1 \text{L}^{-1}$  led to similar outstanding catalytic results (100% MeOPhEtOH yield at 3 h reaction).

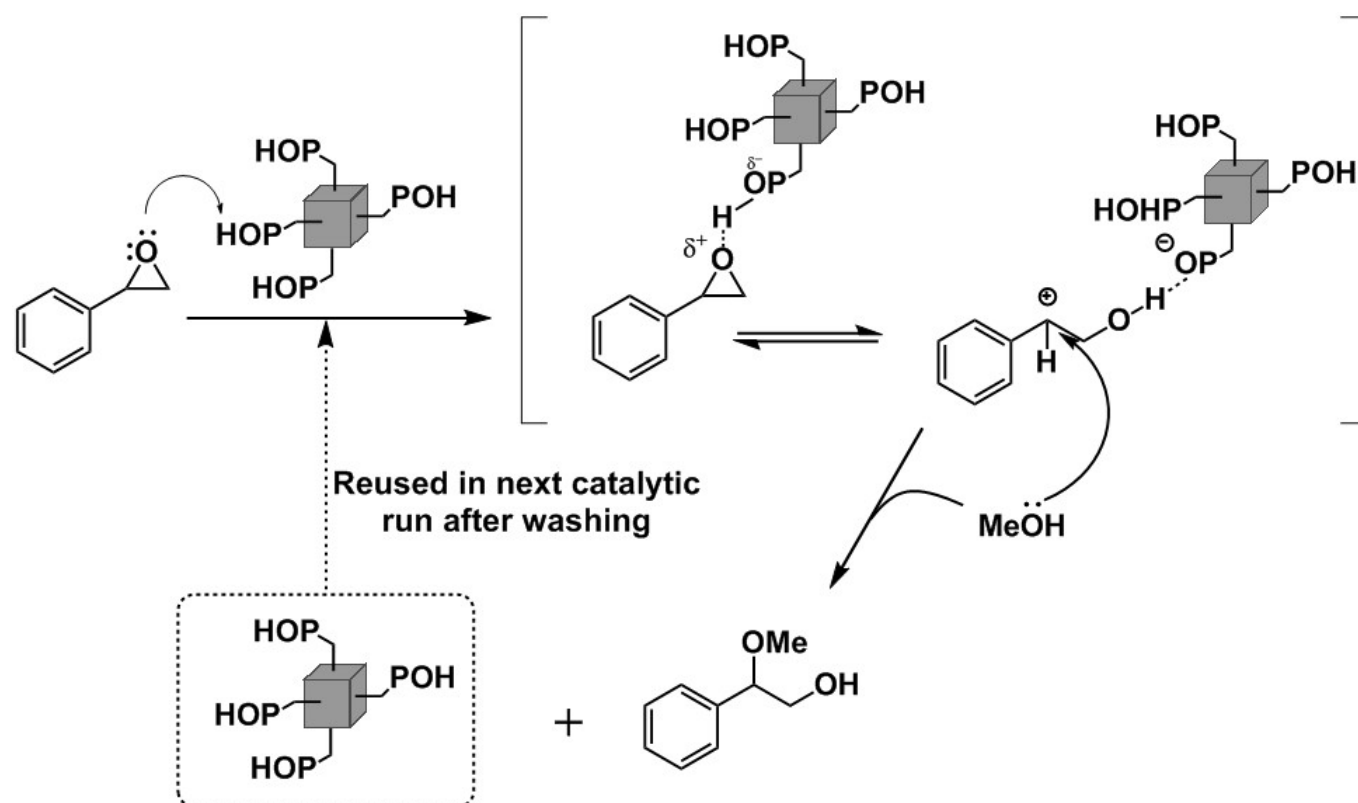

**Scheme S1** - Proposed mechanism for the alcoholysis of styrene oxide (PhEtO) with methanol using **1mw** as a heterogeneous catalyst.

The reaction of PhEtO was faster with methanol than with ethanol, in good agreement with literature data for epoxide alcoholysis when MOFs are used as catalysts.<sup>2, 18</sup> This feature may be partly due to steric hindrance effects associated with the nucleophilic attack of the alcohol at the more hindered carbon atom of the oxirane ring. It is worth mentioning that the regio-chemical outcome of the epoxide ring opening reactions under acid or base conditions can be different: in the acid-catalysed reaction the nucleophile preferentially attacks the more substituted carbon of the oxirane ring, whereas in the base-catalysed reaction the less substituted carbon is preferred. Accordingly, the excellent regioselectivity towards the  $\beta$ -alkoxy alcohol product in the case of **1mw** is consistent with the acid nature of the active sites.

The hybrid material was reused in consecutive batch runs of the methanolysis of PhEtO. The solid catalyst was washed and dried under atmospheric conditions prior to reuse. The initial reaction rate decreased slightly from the first to the second run, and then remained somehow similar. Conversion was, at least, 99% in consecutive 2 h batch runs, with MeOPhEtOH selectivity being always 100%. While the crystalline structure of **1mw** was preserved, the average crystallite size decreased very slightly after the 1<sup>st</sup> run remaining relatively unchanged in subsequent runs (Figure S11). The structural integrity of the catalyst was further probed by using FT-IR spectroscopy (Figure S12).

A comparative study of the catalytic performances of the ligand ( $H_6nmp$ ) and the lanthanide precursors  $La_2O_3$  (used in equivalent molar amounts to those corresponding to  $3.3 \text{ g l}^{-1}$ ) indicated that the catalytic reaction is strongly promoted by Brønsted acidity (Figure S13): while  $H_6nmp$  led to MeOPhEtOH as the sole product formed with 97% yield at 30 min, the reaction of PhEtO in the presence of  $La_2O_3$  was sluggish (a maximum conversion of 3% was reached at 30 min reaction; afterwards the catalyst was deactivated). The catalytic activity of **1mw** resembles more closely that of the ligand precursor than of the lanthanide one. Hence, the high catalytic activity of **1mw** is likely due to Brønsted acid sites associated with its organic component. Similar results have been reported in the literature for the one-dimensional hybrid polymer  $[La(H_4bmt)(H_5bmt)(H_2O)_2] \cdot 3H_2O$  that exhibited outstanding catalytic performance in the ring opening of styrene oxide,<sup>19</sup> even outperforming at that time the nano-sized commercial  $[Cu_3(BTC)_2]$  MOF (well known as HKUST-1) in the same catalytic reaction.<sup>20</sup> Table S5 compares the catalytic results of **1mw** with those reported in the literature for various MOFs tested as catalysts in the same reaction. The catalytic performance of **1mw** stands out outperforming all other materials.

In order to effectively test which active sites are the responsible for the catalytic activity of **1mw** the material was subjected to a post-synthetic acid treatment in order to promote the formation of defect sites on the crystal surface (**1mw-AcT**). Similar high product yields were reached at 1 h of reaction for **1mw** and **1mw-AcT** (99% and 98%, respectively), albeit the initial reaction rate was lower in the latter case (dropped by a factor of *ca.* 1.6 – data not shown). These results clearly suggest that the defect sites do not



play an important catalytic role, and somewhat support that the active sites of **1mw** are Brønsted acid species.

The catalyst could be easily separated from the reaction mixture by filtration or centrifugation. The heterogeneous nature of the catalyst **1mw** was assessed using a leaching test (details given in the Experimental Section). After separating the solid catalyst from the reaction mixture at 15 min and 35 °C, the conversion of PhEtO (*ca.* 45%) ceased to increase, indicating the absence of soluble active species and, ultimately, that **1mw** is a true heterogeneous catalyst (Figure S14). Even though the ligand precursor H<sub>6</sub>nmp was more active than **1mw** (Figure S13), it dissolved completely in the reaction medium being, in this fashion, an homogeneous catalyst for which, in practical applications, more demanding separation and purification processes than **1mw** would be required to separate the catalyst from the target product.

### 3.2. Acetalization of Benzaldehyde

[La<sub>2</sub>(H<sub>3</sub>nmp)<sub>2</sub>(H<sub>2</sub>O)<sub>4</sub>]·4.5H<sub>2</sub>O (**1mw**) was further studied as an heterogeneous acid catalyst in the acetalization of benzaldehyde (BA) with methanol at 35 °C. The material exhibited excellent selectivity towards benzaldehyde dimethyl acetal (BADMA), which was formed as the sole product with 94% yield at 20 h reaction (Figure S15). Table S6 compares the catalytic results for **1mw** with those reported in the literature for various materials tested as solid acid catalysts in the same reaction. The catalytic performance of **1mw** compares favourably with that of other MOFs, namely [Al<sub>2</sub>(BDC)<sub>3</sub>], [Fe(BTC)] and [Cu<sub>3</sub>(BTC)<sub>2</sub>], as well as to other types of solid acid catalysts such as classical large-pore zeolites and mesoporous aluminosilicates (Table S6). The registered differences in catalytic activities between the various materials may be partly due to distinct acidic properties. For example, Timofeeva *et al.*<sup>21</sup> reported that the inclusion of electron-withdrawing NO<sub>2</sub>-groups into the UIO-66 framework enhanced its acidity and, ultimately, the catalytic activity in the acetalization of BA with methanol.

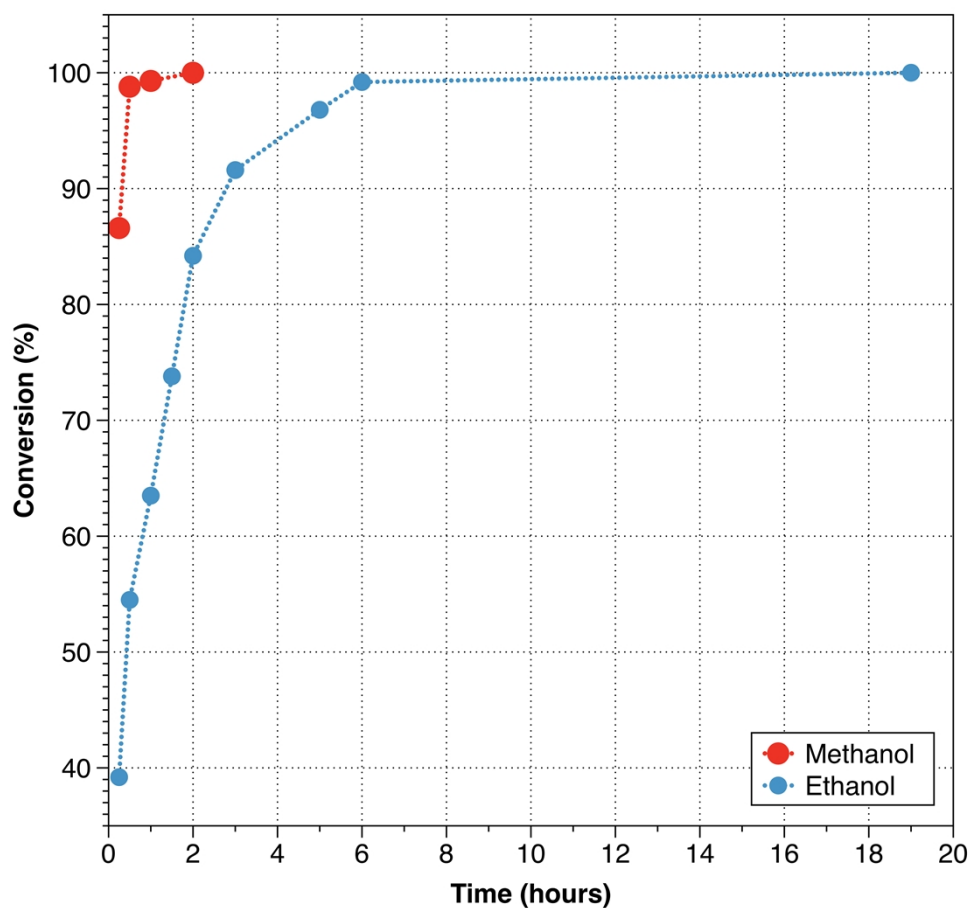

**Figure S10.** Conversion of styrene oxide with methanol or ethanol in the presence of  $[\text{La}_2(\text{H}_3\text{nmp})_2(\text{H}_2\text{O})_4] \cdot 4.5\text{H}_2\text{O}$  (**1mw**) at 35 °C (catalyst load = 20 g<sub>1</sub> L<sup>-1</sup>). The corresponding  $\beta$ -alkoxy alcohol product was formed with 100% selectivity. *Please note:* dashed lines connected experimental points are only for illustrative purposes.

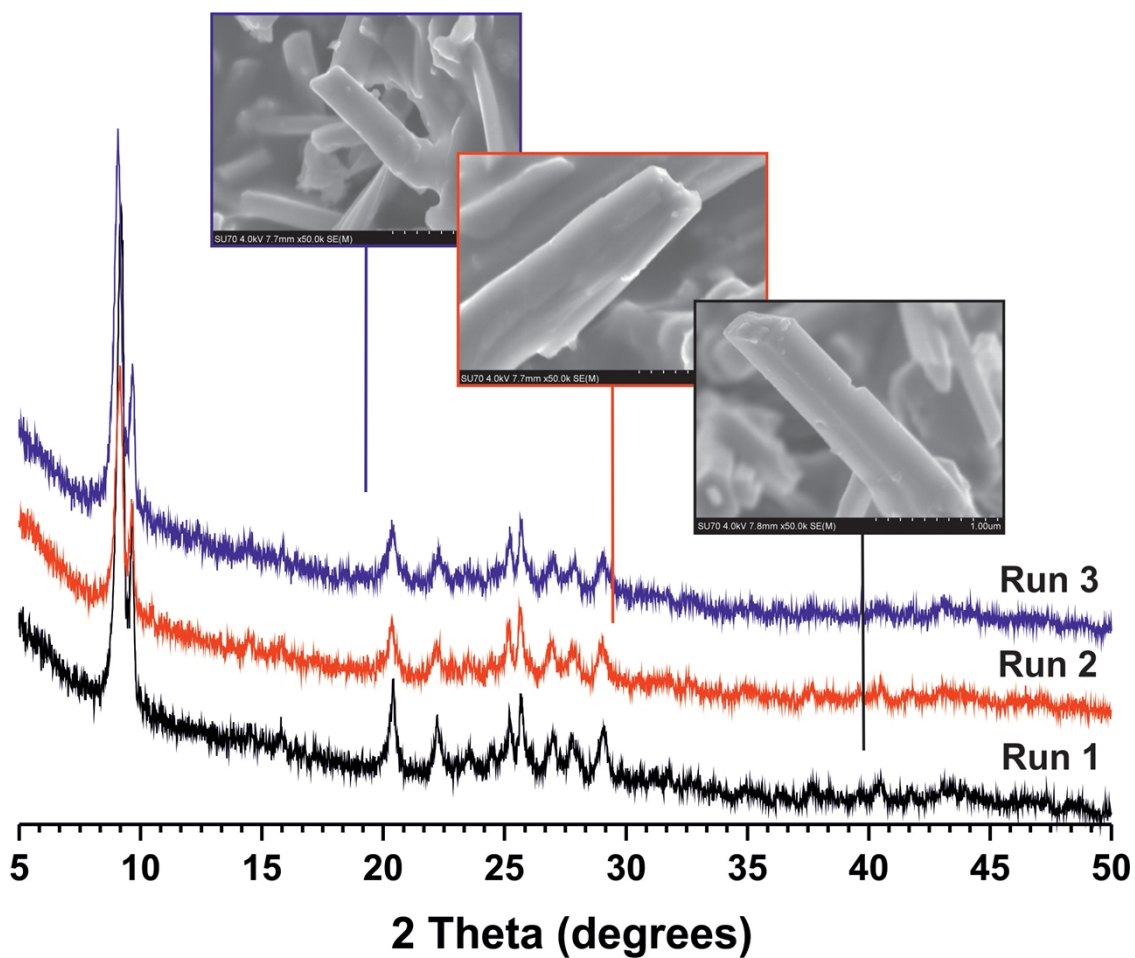

**Figure S11.** Powder X-ray diffraction patterns and SEM images of the bulk  $[\text{La}_2(\text{H}_3\text{nmp})_2(\text{H}_2\text{O})_4] \cdot 4.5\text{H}_2\text{O}$  (**1mw**) catalyst used in three consecutive batch runs of styrene oxide methanolysis.

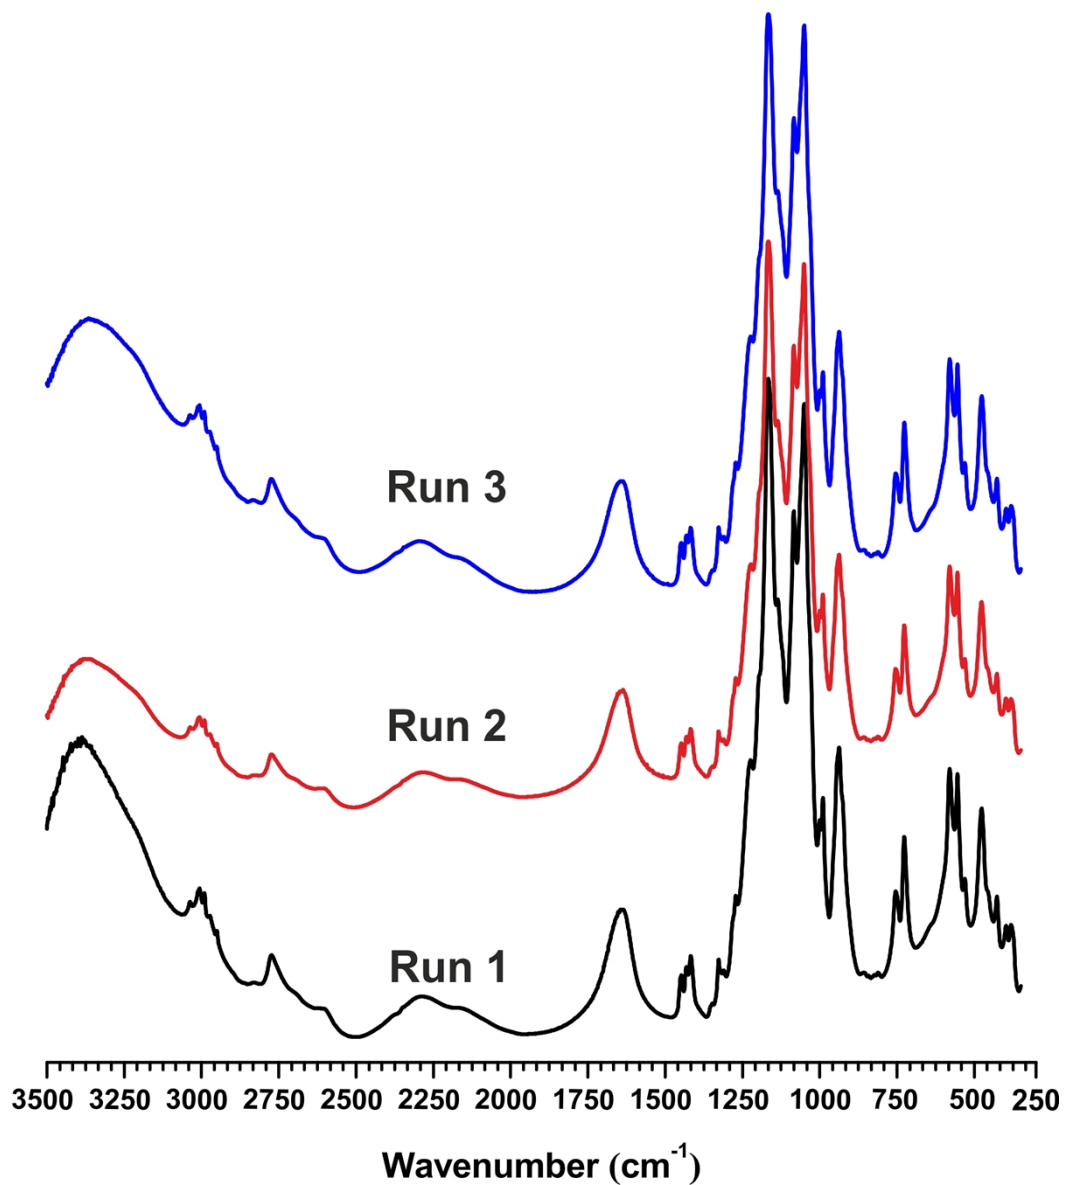

**Figure S12.** FT-IR spectra of the bulk  $[\text{La}_2(\text{H}_3\text{nmp})_2(\text{H}_2\text{O})_4] \cdot 4.5\text{H}_2\text{O}$  (**1mw**) catalysts used in three consecutive batch runs of styrene oxide methanolysis.

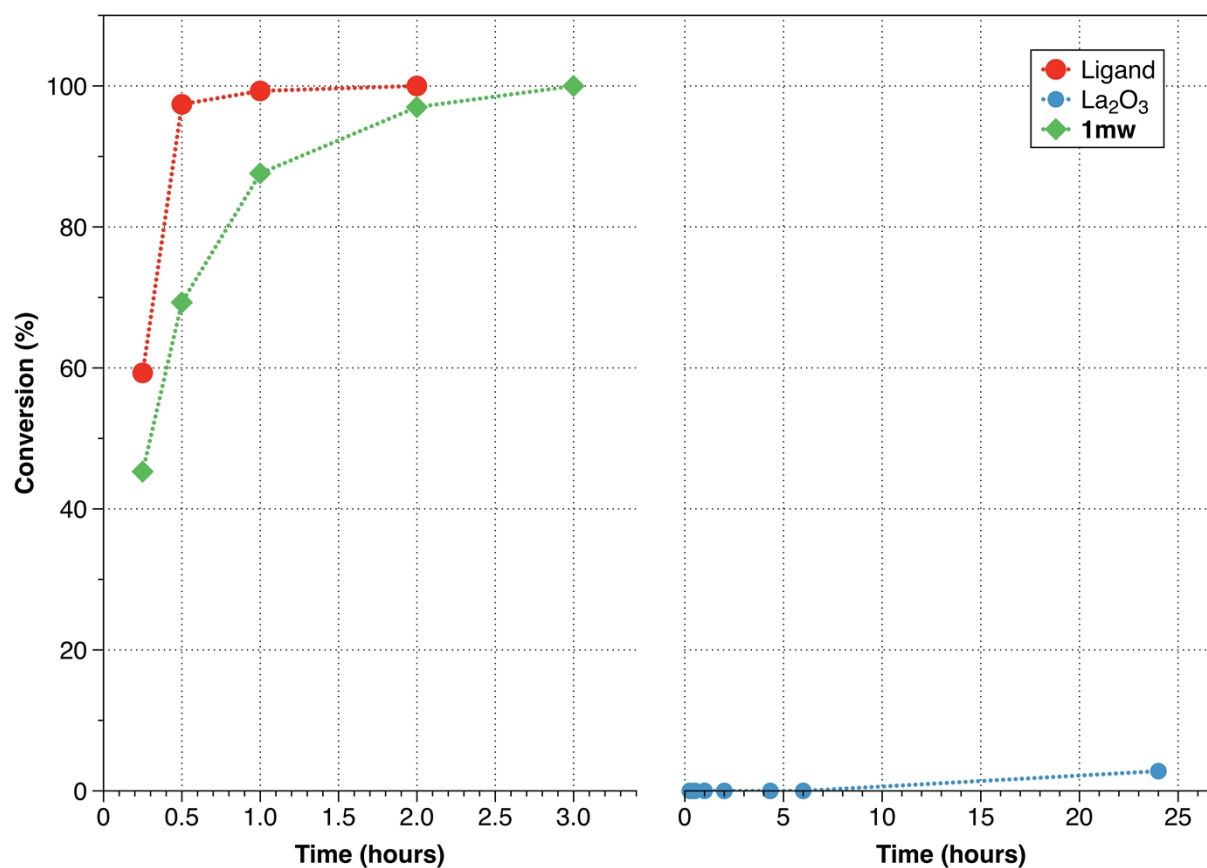

**Figure S13.** Conversion of styrene oxide with methanol in the presence of **1mw**, the ligand precursor  $\text{H}_6\text{nmp}$  or the lanthanide precursor ( $\text{La}_2\text{O}_3$ ), at 35 °C (catalyst load = 3.3 g<sub>l</sub> L<sup>-1</sup>). The precursors were used in equivalent molar amounts to those corresponding to 3.3 g<sub>l</sub> L<sup>-1</sup>. 2-Methoxy-2-phenylethanol was formed with 100% selectivity. *Please note:* dashed lines connected experimental points are only for illustrative purposes.

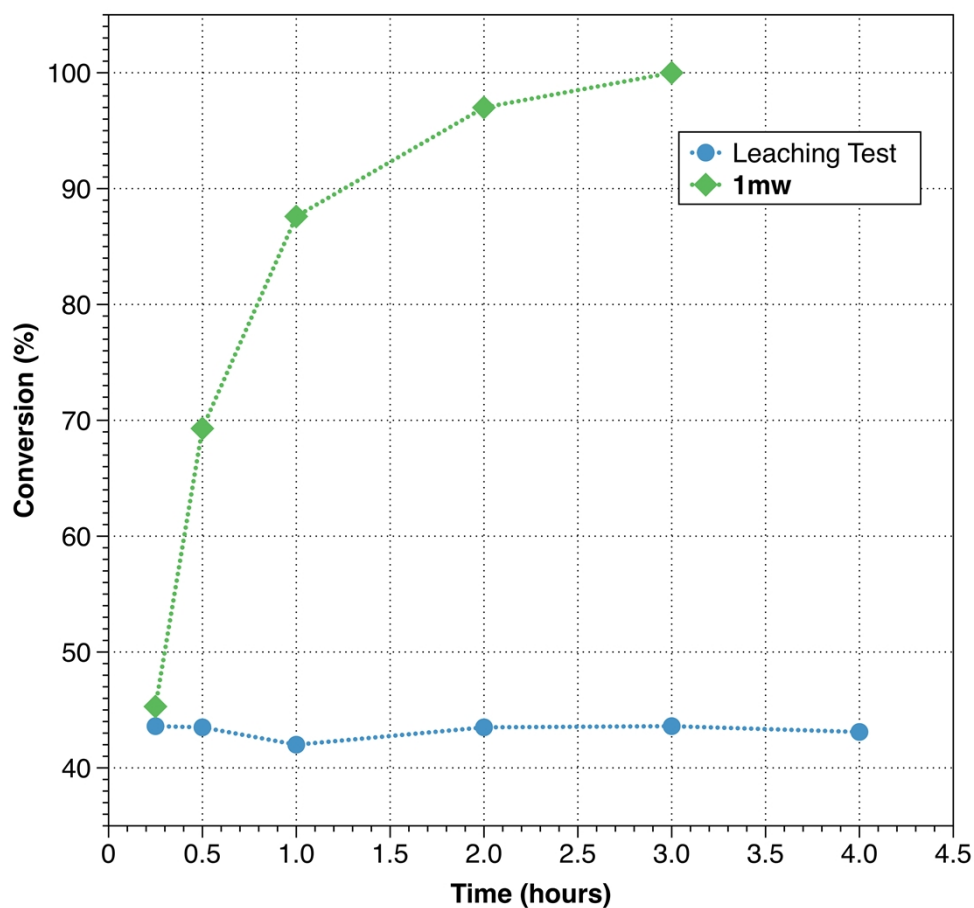

**Figure S14.** Leaching test carried out for **1mw** in the methanolysis of styrene oxide at 35 °C, and comparison to the typical conditions without filtration of the catalyst (catalyst load = 3.3 g<sub>1</sub> L<sup>-1</sup>). 2-Methoxy-2-phenylethanol was formed with 100% selectivity. *Please note:* dashed lines connected experimental points are only for illustrative purposes.

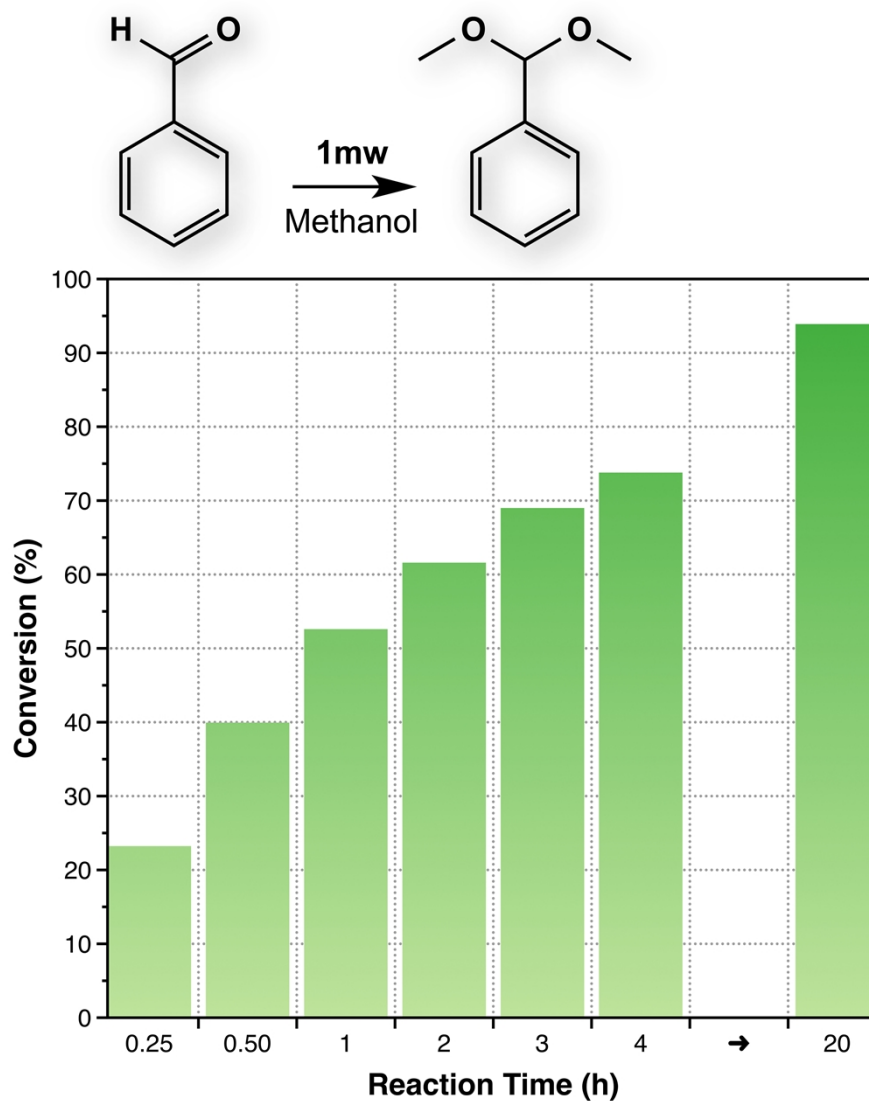

**Figure S15.** Conversion of benzaldehyde with methanol in the presence of **1mw** at 35 °C (catalyst load = 20 g<sub>l</sub> L<sup>-1</sup>). The corresponding benzaldehyde dimethyl acetal product was formed with 100% selectivity.

**Table S5.** Epoxide ring opening of styrene oxide (PhEtO) with methanol or ethanol, in the presence of various MOF catalysts.<sup>a</sup>

| MOFs                                                                                                  | Solvent            | T<br>(°C) | PhEtO<br>(M) | Cat.<br>(g <sub>cat</sub> L <sup>-1</sup> ) | Time                      | Conv.<br>(%)        | Sel.<br>(%) | Ref. |
|-------------------------------------------------------------------------------------------------------|--------------------|-----------|--------------|---------------------------------------------|---------------------------|---------------------|-------------|------|
| <b>1mw</b>                                                                                            | <b>MeOH</b>        | <b>35</b> | <b>0.40</b>  | <b>20</b>                                   | <b>15 min / 30 min</b>    | <b>87 / 99</b>      | <b>100</b>  | -    |
| <b>1mw</b>                                                                                            | <b>MeOH</b>        | <b>35</b> | <b>0.40</b>  | <b>3.3</b>                                  | <b>30 min / 2 h</b>       | <b>69 / 97</b>      | <b>100</b>  | -    |
| <b>1mw</b>                                                                                            | <b>EtOH</b>        | <b>35</b> | <b>0.40</b>  | <b>20</b>                                   | <b>30 min / 2 h / 6 h</b> | <b>55 / 84 / 99</b> | <b>100</b>  | -    |
| <b>[La(H<sub>4</sub>bmt)(H<sub>5</sub>bmt)(H<sub>2</sub>O)<sub>2</sub>].3H<sub>2</sub>O</b>           | <b>MeOH</b>        | <b>35</b> | <b>0.40</b>  | <b>3.3</b>                                  | <b>1 h / 6 h</b>          | <b>40 / 100</b>     | <b>100</b>  | 19   |
| [La(H <sub>3</sub> nmp)]                                                                              | MeOH               | 40        | 0.42         | 17.4                                        | 24 h / 48 h / 72 h        | 40 / 77 / 100       | 100         | 2    |
| [La <sub>2</sub> (H <sub>3</sub> bmt) <sub>2</sub> (H <sub>2</sub> O) <sub>2</sub> ].H <sub>2</sub> O | MeOH               | 55        | 0.41         | 20                                          | 4 h / 24 h                | 10 / 80             | 100         | 22   |
| [Ce <sub>2</sub> (pydc) <sub>3</sub> (H <sub>2</sub> O) <sub>2</sub> ]                                | MeOH               | 55        | 0.41         | 16.3                                        | 24 h / 48 h               | 73 / 77             | 100         | 23   |
| [Ce <sub>2</sub> (pydc) <sub>3</sub> (H <sub>2</sub> O) <sub>2</sub> ]                                | MeOH               | 55        | 0.41         | 3.3                                         | 24 h / 48 h               | 49 / 54             | 100         | 23   |
| [Cu(bpy)(H <sub>2</sub> O) <sub>2</sub> (BF <sub>4</sub> ) <sub>2</sub> (bpy)]                        | MeOH               | rt        | 0.25         | 12.9                                        | 2 h                       | 93                  | 100         | 18   |
| [Cu <sub>3</sub> (BTC) <sub>2</sub> ] (HKUST-1)                                                       | MeOH               | 40        | 0.17         | 6.7                                         | 2.5 h                     | 90                  | 100         | 20   |
| [Cu <sub>3</sub> (BTC) <sub>2</sub> ] (HKUST-1)                                                       | MeOH               | 40        | 0.40         | 10                                          | 10 min / 1 h              | 25 / 93             | 98/95       | 24   |
| [Fe(BTC)]                                                                                             | MeOH               | 40        | 0.40         | 10                                          | 20 min / 1 h              | 69 / >99            | 97/94       | 25   |
| [Fe(BTC)]                                                                                             | EtOH               | 40        | 0.40         | 10                                          | 1 h / 24 h                | 14/35               | >95         | 25   |
| [Al <sub>2</sub> (BDC) <sub>3</sub> ]                                                                 | MeOH               | 40        | 0.40         | 10                                          | 30 min / 1 h              | 21/67               | 98/96       | 25   |
| MIL-101(H <sub>2</sub> O)                                                                             | MeOH               | 40        | 0.13         | 5                                           | 20 min                    | 22                  | >99         | 24   |
| MIL-101(HPW)                                                                                          | MeOH               | 40        | 0.13         | 5                                           | 20 min                    | 99                  | >99         | 24   |
| MIL-53(Al)-AMMal                                                                                      | CD <sub>3</sub> OD | 25        | 0.20         | <sup>c</sup>                                | 48 h                      | 100                 | 100         | 26   |

<sup>a</sup> The experimental conditions which were used are indicated for comparison: solvent, reaction temperature (T; rt = ambient temperature), initial molar concentration of PhEtO, catalyst load (Cat.) and reaction time. The catalytic results are reported as conversion of PhEtO (Conv.) and selectivity towards the β-alkoxy alcohol product (Sel.; when a single value of Sel. is indicated it indicates that it was constant with time).

<sup>b</sup> The abbreviations of the names of the MOFs are the same as those used in the original publications.

<sup>c</sup> The amount of MOF used was *ca.* 0.04 mol (based on free carboxylate groups) per litre of alcohol.



**Table S6.** Acetalization of benzaldehyde (BA) with methanol in the presence of solid acid catalysts.<sup>a</sup>

| Solid catalyst <sup>b</sup>           | T (°C)    | BA (M)      | Cat. (g <sub>cat</sub> L <sup>-1</sup> ) | Time (h)    | Conv. (%)    | Sel. (%)   | Ref. |
|---------------------------------------|-----------|-------------|------------------------------------------|-------------|--------------|------------|------|
| <b>UIO-66-NO<sub>2</sub></b>          | <b>30</b> | <b>0.31</b> | <b>16.7</b>                              | <b>4</b>    | <b>100</b>   | <b>100</b> | 21   |
| <b>1mw</b>                            | <b>35</b> | <b>0.40</b> | <b>20</b>                                | <b>4/20</b> | <b>74/94</b> | <b>100</b> | -    |
| UIO-66-NH <sub>2</sub>                | 30        | 0.31        | 16.7                                     | 4/18        | 20/81        | 100        | 21   |
| [Cu <sub>3</sub> (BTC) <sub>2</sub> ] | rt        | 0.31        | 16.7                                     | 24          | 88           | 100        | 27   |
| [Cu <sub>3</sub> (BTC) <sub>2</sub> ] | rt        | 3.13        | 16.7                                     | 48          | 66           | 98         | 27   |
| [Cu <sub>3</sub> (BTC) <sub>2</sub> ] | rt        | 0.33        | 33.3                                     | 24          | 94           | 100        | 27   |
| [Al <sub>2</sub> (BDC) <sub>3</sub> ] | rt        | 0.31        | 16.7                                     | 24          | 66           | 100        | 27   |
| [Fe(BTC)]                             | rt        | 0.31        | 16.7                                     | 24          | 71           | 100        | 27   |
| Bentonite                             | rt        | 0.33        | 33.3                                     | 8           | 5            | 100        | 27   |
| NaY                                   | rt        | 0.33        | 33.3                                     | 8           | 10           | 100        | 27   |
| USY-500                               | rt        | 0.33        | 33.3                                     | 24          | 63           | 100        | 27   |
| Zeolite Beta                          | rt        | 0.33        | 33.3                                     | 24          | 69           | 100        | 27   |
| MIL101/PTA                            | 25        | 0.47        | 1.5                                      | 24          | 95           | 100        | 28   |
| PTA                                   | 25        | 0.47        | 1.5                                      | 24          | 93           | 100        | 28   |
| MIL-101                               | 25        | 0.47        | 1.5                                      | 24          | 80           | 100        | 28   |
| MIL-100(Fe)                           | 40        | 0.59        | 2                                        | 21          | 69           | 100        | 29   |
| [Fe(BTC)]                             | 40        | 0.59        | 1.8                                      | 21          | 84           | 100        | 29   |
| Al-MCM-41                             | 50        | 0.33        | 6.7                                      | 5           | 56           | 96         | 30   |
| Ce <sup>3+</sup> -Montmorillonite     | rt        | 2.47        | 5                                        | 10          | 91           | 100        | 31   |
| H-Y                                   | rt        | 2.47        | 5                                        | 10          | 32           | 100        | 31   |
| Ce-H-Y                                | rt        | 2.47        | 5                                        | 10          | 70           | 100        | 31   |
| γ-Al <sub>2</sub> O <sub>3</sub>      | rt        | 2.47        | 5                                        | 10          | 4            | 100        | 31   |
| SiO <sub>2</sub>                      | rt        | 2.47        | 5                                        | 10          | 0            | 100        | 31   |

<sup>a</sup> Experimental conditions: T = reaction temperature (*please note*: rt = ambient temperature); BA = initial molar concentration of BA; Cat. = catalyst load; reaction time. The catalytic results are reported as conversion of BA (Conv.) and selectivity towards BA-acetal (Sel.).

<sup>b</sup> The abbreviations of the names of the solid catalysts are the same as those used in the original publications.

## 4. Transformation Studies

$[\text{La}_2(\text{H}_3\text{nmp})_2(\text{H}_2\text{O})_4] \cdot 4.5\text{H}_2\text{O}$  (**1mw**) can be transformed at 100 °C into two different layered materials reported previously by our group (Figure S16):  $[\text{La}(\text{H}_3\text{nmp})] \cdot 1.5\text{H}_2\text{O}$  (**2**)<sup>1</sup> and  $[\text{La}(\text{H}_3\text{nmp})]$  (**3**).<sup>2</sup> Using one-pot conditions, **2** is always isolated as a pure phase after 24 h (Figure S17). The same occurs when a hydrothermal approach is employed in conjunction with a very slow cooling of the reaction vessels up to the ambient temperature (Figure S18). If instead the vessels are quenched in cold water, a mixture of both **2** and **3** is isolated, with the latter material being the predominant phase (Figure S19). Figure S16 summarizes the reaction conditions employed for the transformation tests and the phases that are obtained in each situation, while Figures S17 to S19 depict the powder X-ray diffraction patterns of the transformed phases compared with simulations for the two previously reported layered materials. Currently, we do not have any evidence for the real mechanism in which these transformations occur. Even though during the one-pot synthesis no complete dissolution of **1mw** was observed, the need of addition of acid to all reactions might ultimately indicate that the primary building units may, indeed, undergo dissolution in a first stage and only then be used to produce compounds **2** and **3**.

As described in the main paper, the two crystallographically independent  $\text{La}^{3+}$  coordination environments composing **1mw** share several similarities. Particularly, both environments comprise two coordinated water molecules that could easily be displaced in order to promote polymerization into compounds **2** and **3**. Indeed, as shown in Figure S16, the  $\infty^1[\text{La}_2(\text{H}_3\text{nmp})_2(\text{H}_2\text{O})_4]$  polymer can be topologically envisaged as a zigzag chain of  $\text{La}^{3+}$  cations with intermetallic distances oscillating between 4.25 and 4.36 Å. A close inspection of the layers present in  $[\text{La}(\text{H}_3\text{nmp})] \cdot 1.5\text{H}_2\text{O}$ <sup>1</sup> and  $[\text{La}(\text{H}_3\text{nmp})]$ ,<sup>2</sup> both with a (4,4) topology, reveals that their core is simply assembled by the lanthanide cation and one phosphonate group, with small differences in the connectivities as shown in Figure S16. In the case of compound **2**, a clear zigzag chain with intermetallic distance of 4.24 Å strongly resembles the connectivity present in **1mw**. It is, thus, not surprising to observe that this material is easily obtained under all methods employed for the transformation tests, being readily isolated as a pure phase. The core layer of compound **3** is significantly more distinct implying a strong rearrangement of the connectivity of the phosphonate group (the intermetallic distances are, for example, significantly different from those present in **1mw**). In this context, one can easily understand how the transformation requires a longer reaction time (48 h) and a drastic quench of the temperature of the reaction vessel.

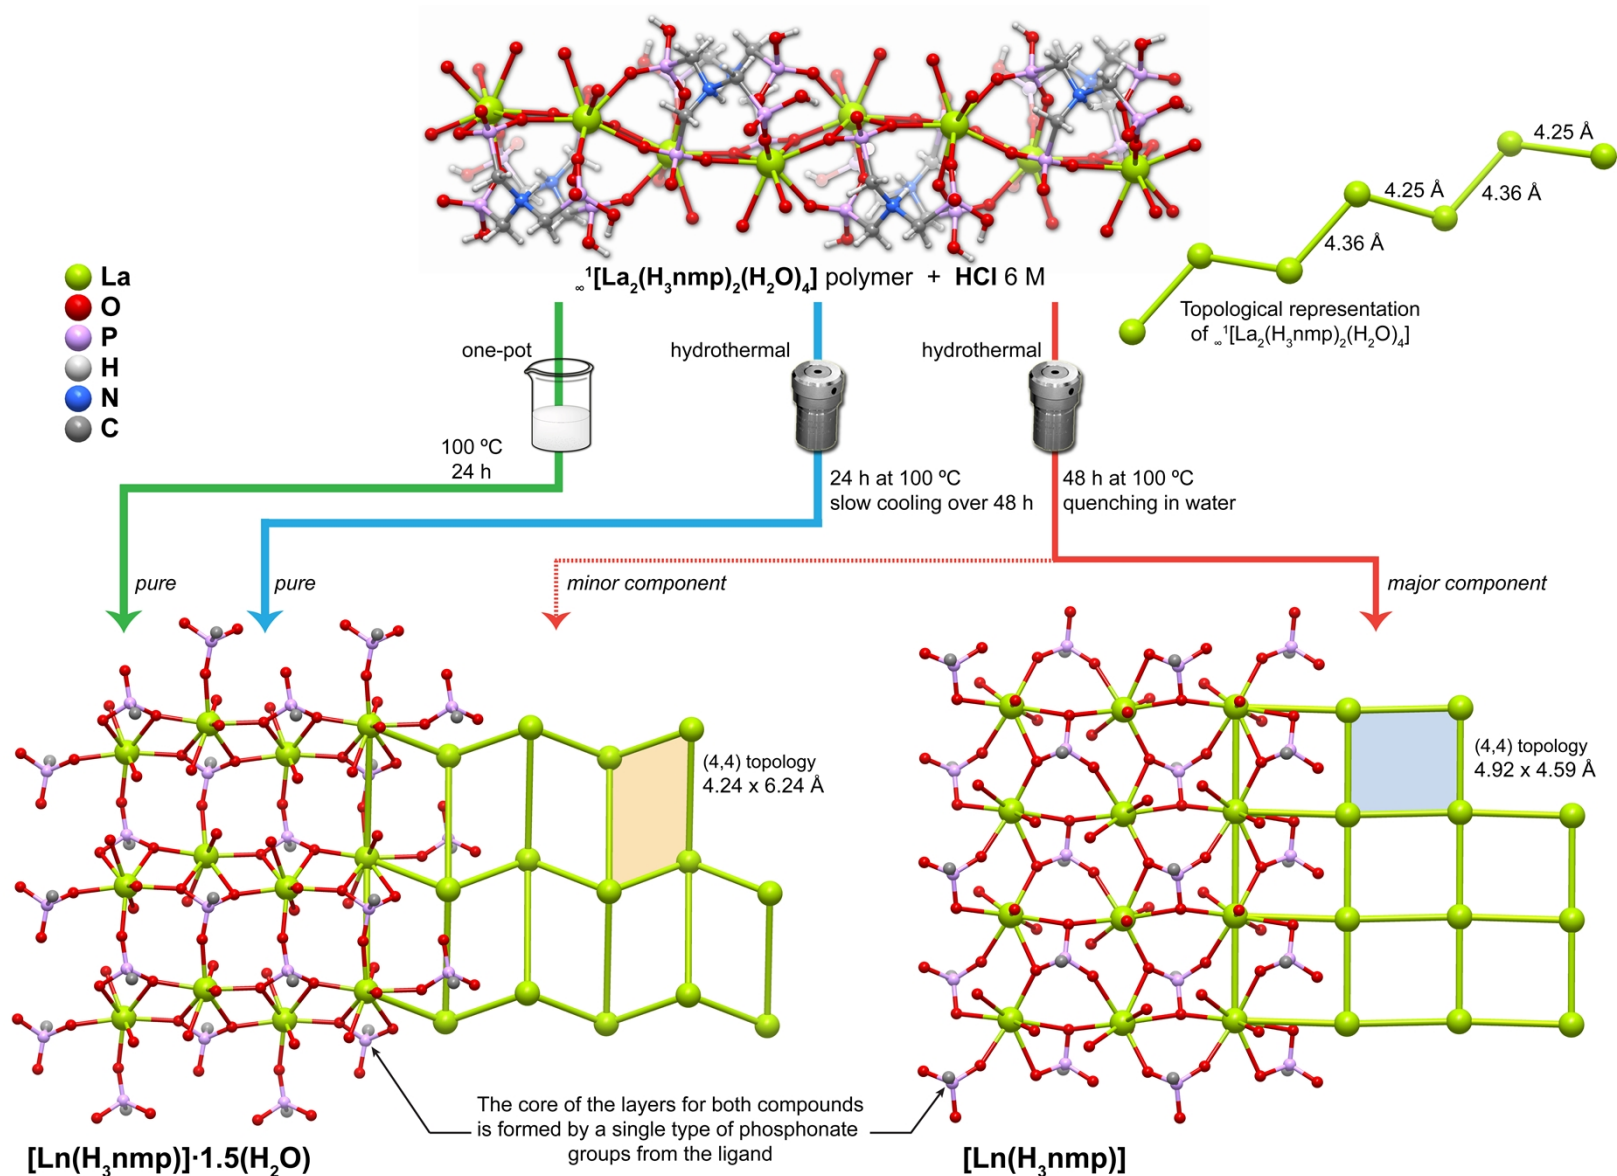

**Figure S16.** Conversion of  $[\text{La}_2(\text{H}_3\text{nmp})_2(\text{H}_2\text{O})_4]\cdot 4.5\text{H}_2\text{O}$  (**1mw**) into the layered  $[\text{La}(\text{H}_3\text{nmp})]\cdot 1.5\text{H}_2\text{O}$  (**2**)<sup>1</sup> and  $[\text{La}(\text{H}_3\text{nmp})]$  (**3**)<sup>2</sup> materials using hydrothermal and one-pot synthetic conditions.

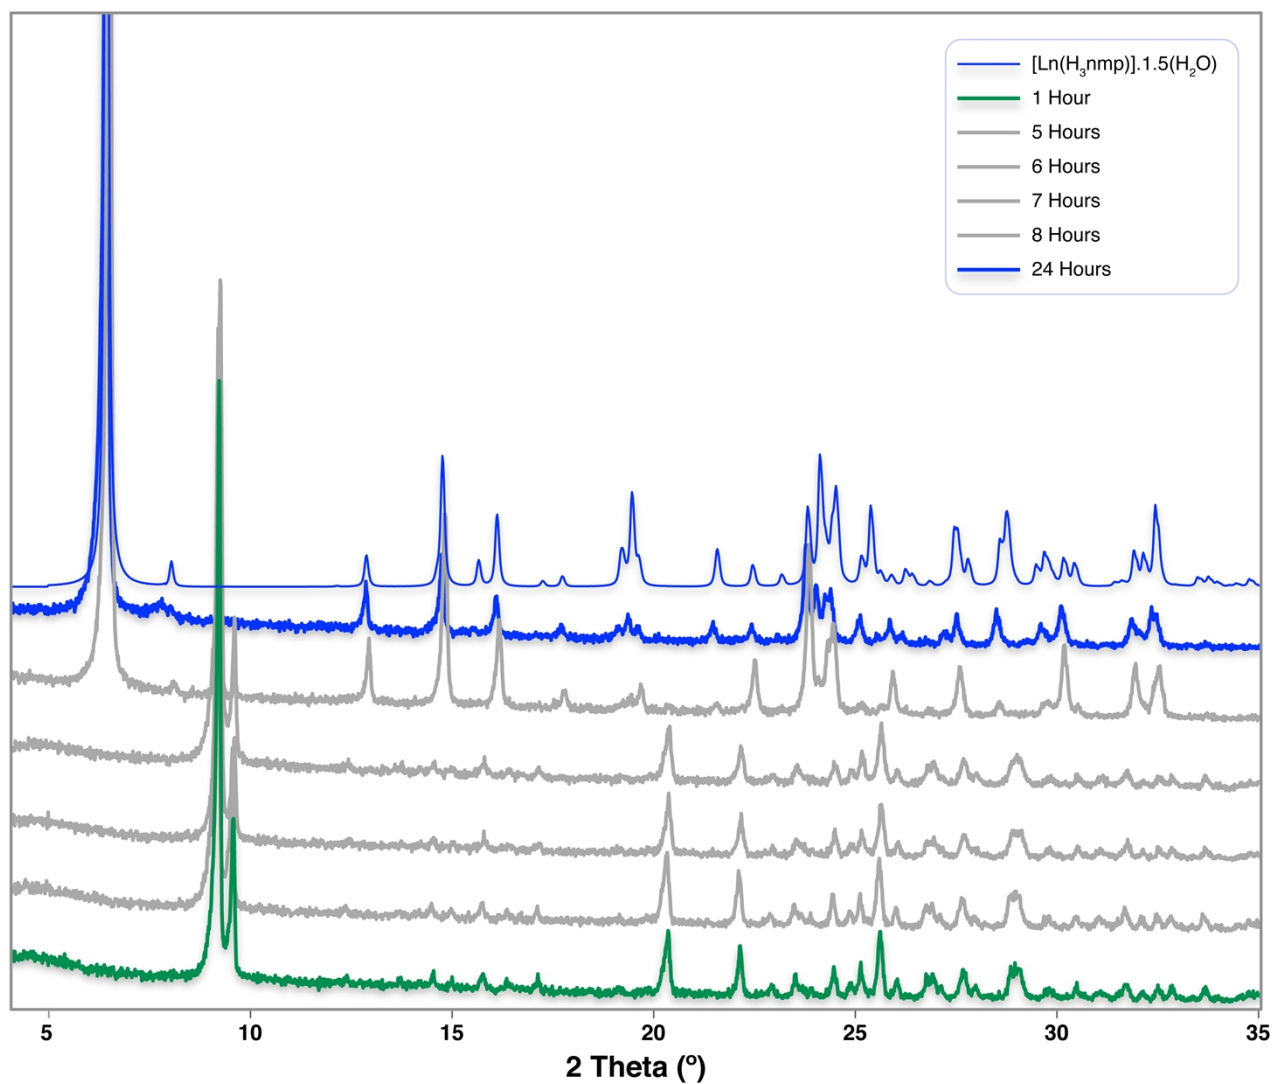

**Figure S17.** Conversion of  $[\text{La}_2(\text{H}_3\text{nmp})_2(\text{H}_2\text{O})_4]\cdot 4.5\text{H}_2\text{O}$  (**1mw**) into the layered  $[\text{La}(\text{H}_3\text{nmp})]\cdot 1.5\text{H}_2\text{O}$  (**2**) material using one-pot conditions (100 °C over 24 h).

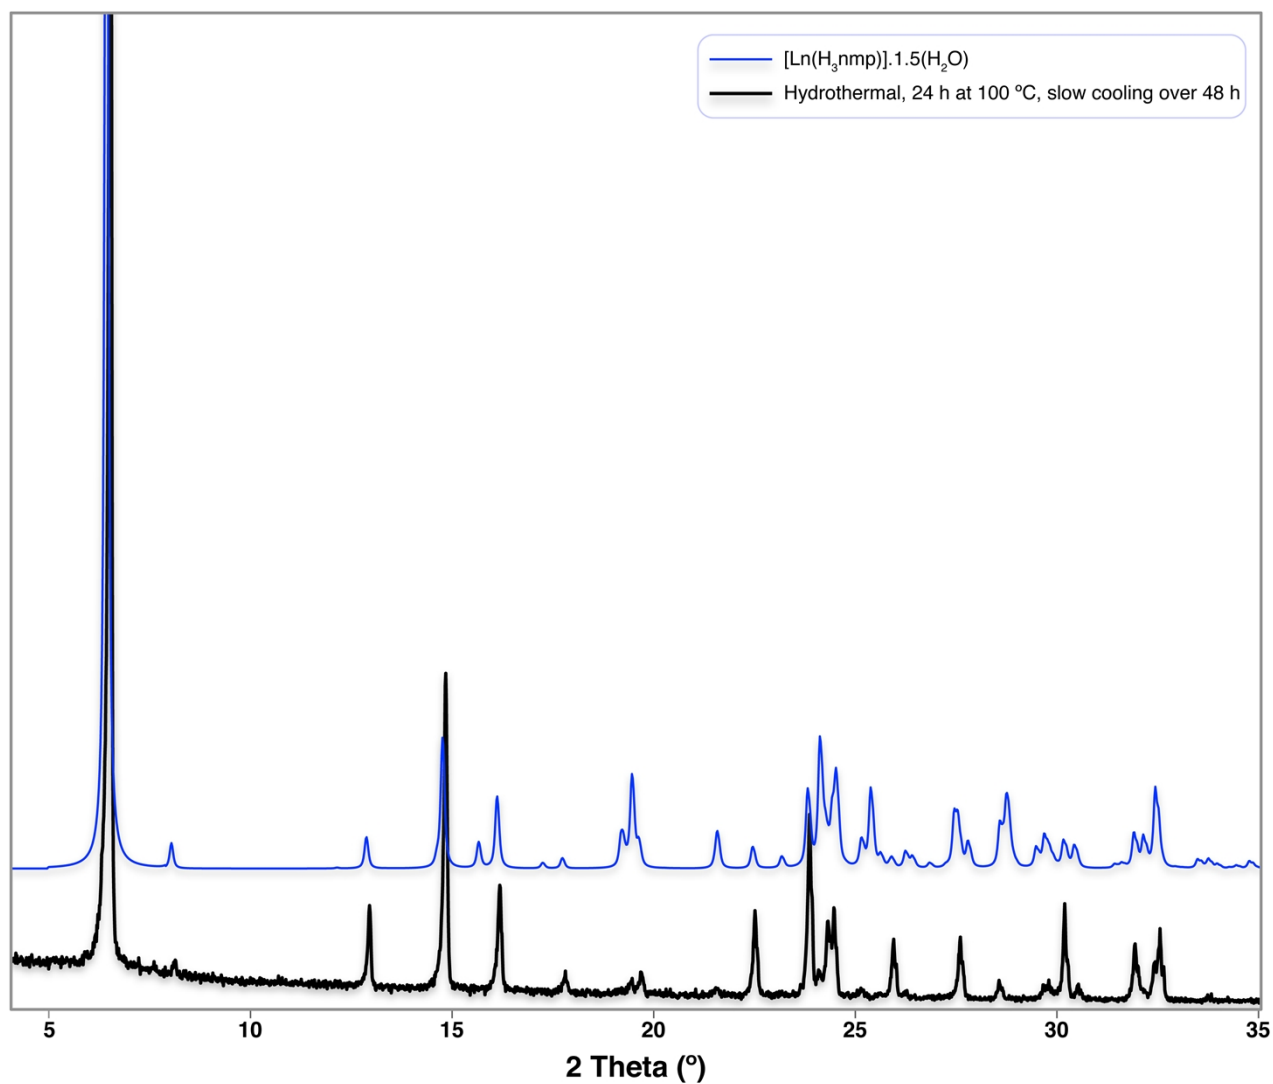

**Figure S18.** Conversion of  $[\text{La}_2(\text{H}_3\text{nmp})_2(\text{H}_2\text{O})_4]\cdot 4.5\text{H}_2\text{O}$  (**1mw**) into the layered  $[\text{La}(\text{H}_3\text{nmp})]\cdot 1.5\text{H}_2\text{O}$  (**2**) material using hydrothermal conditions (100 °C over 24 h, with slow cooling to ambient temperature over a period of 48 h).

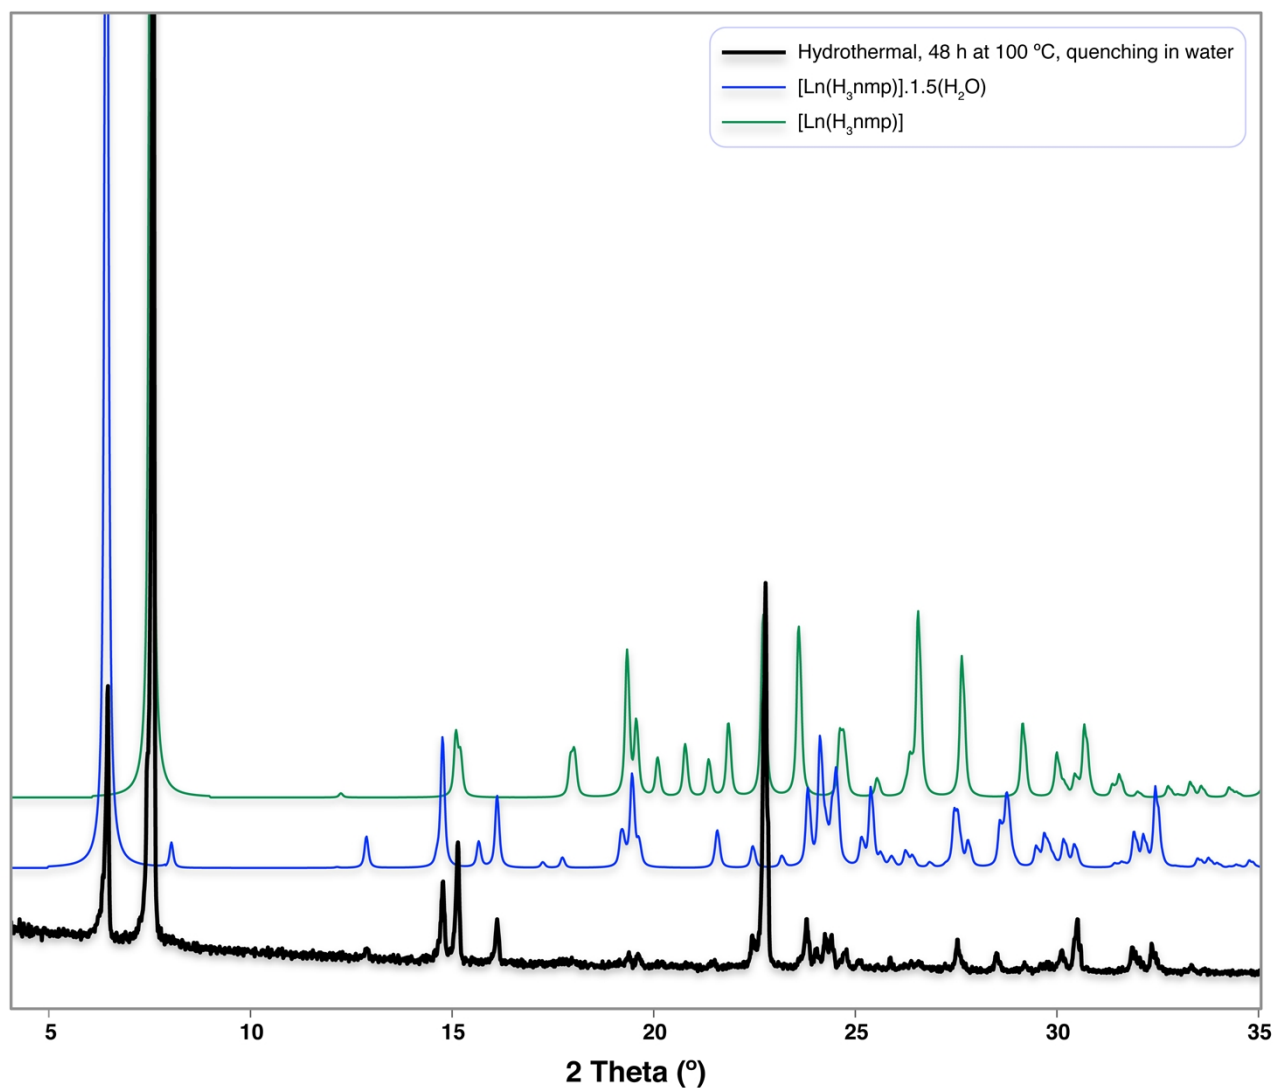

**Figure S19.** Conversion of  $[\text{La}_2(\text{H}_3\text{nmp})_2(\text{H}_2\text{O})_4] \cdot 4.5\text{H}_2\text{O}$  (**1mw**) into a mixture of layered  $[\text{La}(\text{H}_3\text{nmp})] \cdot 1.5\text{H}_2\text{O}$  (**2**) and  $[\text{La}(\text{H}_3\text{nmp})]$  (**3**) materials using hydrothermal conditions (100 °C over 48 h with a rapid quenching of the reaction vessels in cold water).

## 5. References

1. L. Cunha-Silva, L. Mafra, D. Ananias, L. D. Carlos, J. Rocha and F. A. A. Paz, *Chem. Mater.*, 2007, **19**, 3527-3538.
2. P. Silva, F. Vieira, A. C. Gomes, D. Ananias, J. A. Fernandes, S. M. Bruno, R. Soares, A. A. Valente, J. Rocha and F. A. A. Paz, *J. Am. Chem. Soc.*, 2011, **133**, 15120-15138.
3. T. Kottke and D. Stalke, *J. Appl. Crystallogr.*, 1993, **26**, 615-619.
4. APEX2, *Data Collection Software Version 2012.4*, Bruker AXS, Delft, The Netherlands, 2012.
5. A. A. Coelho, *J. Appl. Crystallogr.*, 2003, **36**, 86-95.
6. SAINT+, *Data Integration Engine v. 8.27b*©, 1997-2012, Bruker AXS, Madison, Wisconsin, USA.
7. G. M. Sheldrick, *SADABS 2012/1*, Bruker AXS Area Detector Scaling and Absorption Correction 2012, Bruker AXS, Madison, Wisconsin, USA.
8. G. M. Sheldrick, *SHELXT-2014*, Program for Crystal Structure Solution, University of Göttingen, 2014.
9. (a) G. M. Sheldrick, *Acta Cryst. A*, 2008, **64**, 112-122; (b) G. M. Sheldrick, *SHELXL Version 2014*, Program for Crystal Structure Refinement, University of Göttingen, 2014.
10. C. B. Hübschle, G. M. Sheldrick and B. Dittrich, *J. Appl. Crystallogr.*, 2011, **44**, 1281-1284.
11. K. Brandenburg, *DIAMOND*, Version 4.0.0. Crystal Impact GbR, Bonn, Germany, 1997-2014.
12. (a) A. N. Fitch, in *European Powder Diffraction: EPDIC IV, Pts 1 and 2*, Transtec Publications Ltd, Zurich-Uetikon, 1996, vol. 228, pp. 219-221; (b) A. N. Fitch, *Journal of Research of the National Institute of Standards and Technology*, 2004, **109**, 133-142.
13. H. M. Rietveld, *J. Appl. Crystallogr.*, 1969, **2**, 65-71.
14. A. Coelho, *Topas Academic, Version 5.0*, Coelho Software, Brisbane, 2013.
15. R. W. Cheary and A. Coelho, *J. Appl. Crystallogr.*, 1992, **25**, 109-121.
16. (a) W. A. Dollase, *J. Appl. Crystallogr.*, 1986, **19**, 267-272; (b) A. March, *Zeitschrift für Kristallographie*, 1932, **81**, 285-297.
17. G. Socrates, *Infrared Characteristic Group Frequencies - Tables and Charts*, 2<sup>nd</sup> edn., John Wiley & Sons Ltd, Baffins Lane, Chichester, 1994.
18. D. M. Jiang, A. Urakawa, M. Yulikov, T. Mallat, G. Jeschke and A. Baiker, *Chem.-Eur. J.*, 2009, **15**, 12255-12262.
19. S. M. F. Vilela, A. D. G. Firmino, R. F. Mendes, J. A. Fernandes, D. Ananias, A. A. Valente, H. Ott, L. D. Carlos, J. Rocha, J. P. C. Tome and F. A. Almeida Paz, *Chem. Commun.*, 2013, **49**, 6400-6402.
20. L. H. Wee, M. R. Lohe, N. Janssens, S. Kaskel and J. A. Martens, *J. Mater. Chem.*, 2012, **22**, 13742-13746.

21. M. N. Timofeeva, V. N. Panchenko, J. W. Jun, Z. Hasan, M. M. Matrosova and S. H. Jung, *Appl. Catal. A-Gen.*, 2014, **471**, 91-97.
22. S. M. F. Vilela, D. Ananias, A. C. Gomes, A. A. Valente, L. D. Carlos, J. A. S. Cavaleiro, J. Rocha, J. P. C. Tomé and F. A. A. Paz, *J. Mater. Chem.*, 2012, **22**, 18354-18371.
23. P. Silva, D. Ananias, S. M. Bruno, A. A. Valente, L. D. Carlos, J. Rocha and F. A. Almeida Paz, *Eur. J. Inorg. Chem.*, 2013, **2013**, 5576-5591.
24. L. H. Wee, F. Bonino, C. Lamberti, S. Bordiga and J. A. Martens, *Green Chem.*, 2014, **16**, 1351-1357.
25. A. Dhakshinamoorthy, M. Alvaro and H. Garcia, *Chem.-Eur. J.*, 2010, **16**, 8530-8536.
26. S. J. Garibay, Z. Wang and S. M. Cohen, *Inorg. Chem.*, 2010, **49**, 8086-8091.
27. A. Dhakshinamoorthy, M. Alvaro and H. Garcia, *Adv. Synth. Catal.*, 2010, **352**, 3022-3030.
28. L. Bromberg and T. A. Hatton, *ACS Appl. Mater. Interfaces*, 2011, **3**, 4756-4764.
29. A. Dhakshinamoorthy, M. Alvaro, P. Horcajada, E. Gibson, M. Vishnuvarthan, A. Vimont, J.-M. Grenèche, C. Serre, M. Daturi and H. Garcia, *ACS Catalysis*, 2012, **2**, 2060-2065.
30. S. Ajaikumar and A. Pandurangan, *J. Mol. Catal. A: Chem.*, 2008, **290**, 35-43.
31. B. Thomas, V. G. Ramu, S. Gopinath, J. George, M. Kurian, G. Laurent, G. L. Drisko and S. Sugunan, *Appl. Clay Sci.*, 2011, **53**, 227-235.
